# Supplementary material for: Dichotocejpins A–C: New Diketopiperazines from a Deep-Sea-Derived Fungus Dichotomomyces cejpii FS110
Source: PubMed Central journal article supplement (PMC5039535; doi:10.3390/md14090164), 2016-09-09
Supplement: marinedrugs-14-00164-s001.pdf [file marinedrugs-14-00164-s001.pdf]

# Supplementary Materials: Dichotocejpins A–C: New Diketopiperazines from a Deep-Sea-Derived Fungus *Dichotomomyces cejprii* FS110

Zhen Fan, Zhang-Hua Sun, Zhong Liu, Yu-Chan Chen, Hong-Xin Liu, Hao-Hua Li and Wei-Min Zhang

## List of Supporting Information

- Figure S1.**  $^1\text{H}$  NMR spectrum of dichotocejpin A (1) in  $\text{CDCl}_3$ .  
**Figure S2.**  $^{13}\text{C}$  NMR and DEPT135 spectra of dichotocejpin A (1) in  $\text{CDCl}_3$ .  
**Figure S3.** HSQC spectrum of dichotocejpin A (1) in  $\text{CDCl}_3$ .  
**Figure S4.**  $^1\text{H}$ – $^1\text{H}$  COSY spectrum of dichotocejpin A (1) in  $\text{CDCl}_3$ .  
**Figure S5.** HMBC spectrum of dichotocejpin A (1) in  $\text{CDCl}_3$ .  
**Figure S6.** HRESIMS spectrum of dichotocejpin A (1).  
**Figure S7.** IR spectrum of dichotocejpin A (1).  
**Figure S8.** UV spectrum of dichotocejpin A (1).  
**Figure S9.**  $^1\text{H}$  NMR spectrum of dichotocejpin B (2) in  $\text{DMSO}-d_6$ .  
**Figure S10.**  $^{13}\text{C}$  NMR and DEPT135 spectra of dichotocejpin B (2) in  $\text{DMSO}-d_6$ .  
**Figure S11.** HSQC spectrum of dichotocejpin B (2) in  $\text{DMSO}-d_6$ .  
**Figure S12.**  $^1\text{H}$ – $^1\text{H}$  COSY spectrum of dichotocejpin B (2) in  $\text{DMSO}-d_6$ .  
**Figure S13.** HMBC spectrum of dichotocejpin B (2) in  $\text{DMSO}-d_6$ .  
**Figure S14.** NOESY spectrum of dichotocejpin B (2) in  $\text{DMSO}-d_6$ .  
**Figure S15.** HRESIMS spectrum of dichotocejpin B (2).  
**Figure S16.** IR spectrum of dichotocejpin A (2).  
**Figure S17.** UV spectrum of dichotocejpin A (2).  
**Figure S18.**  $^1\text{H}$  NMR spectrum of dichotocejpin C (3) in  $\text{DMSO}-d_6$ .  
**Figure S19.**  $^{13}\text{C}$  NMR spectrum of dichotocejpin C (3) in  $\text{DMSO}-d_6$ .  
**Figure S20.** HSQC spectrum of dichotocejpin C (3) in  $\text{DMSO}-d_6$ .  
**Figure S21.**  $^1\text{H}$ – $^1\text{H}$  COSY spectrum of dichotocejpin C (3) in  $\text{DMSO}-d_6$ .  
**Figure S22.** HMBC spectrum of dichotocejpin C (3) in  $\text{DMSO}-d_6$ .  
**Figure S23.** HRESIMS spectrum of dichotocejpin C (3) in  $\text{DMSO}-d_6$ .  
**Figure S24.** IR spectrum of dichotocejpin A (3).  
**Figure S25.** UV spectrum of dichotocejpin A (3).  
**Figure S26.**  $^1\text{H}$  NMR spectrum of compound 4 in  $\text{CD}_3\text{OD}$ .  
**Figure S27.** ESI-MS spectrum of compound 4.  
**Figure S28.**  $^1\text{H}$  NMR spectrum of compound 5 in  $\text{CD}_3\text{OD}$ .  
**Figure S29.**  $^{13}\text{C}$  NMR spectrum of compound 5 in  $\text{CD}_3\text{OD}$ .  
**Figure S30.**  $^1\text{H}$  NMR spectrum of compound 6 in  $\text{CDCl}_3$ .  
**Figure S31.**  $^{13}\text{C}$  NMR spectrum of compound 6 in  $\text{CDCl}_3$ .  
**Figure S32.** ESI-MS spectrum of compound 6.  
**Figure S33.**  $^1\text{H}$  NMR spectrum of compound 7 in  $\text{DMSO}-d_6$ .  
**Figure S34.**  $^{13}\text{C}$  NMR spectrum of compound 7 in  $\text{DMSO}-d_6$ .  
**Figure S35.** ESI-MS spectrum of compound 7.  
**Figure S36.**  $^1\text{H}$  NMR spectrum of compound 8 in  $\text{DMSO}-d_6$ .  
**Figure S37.**  $^{13}\text{C}$  NMR spectrum of compound 8 in  $\text{DMSO}-d_6$ .  
**Figure S38.** ESI-MS spectrum of compound 8.  
**Figure S39.**  $^1\text{H}$  NMR spectrum of compound 9 in  $\text{CD}_3\text{OD}$ .  
**Figure S40.**  $^{13}\text{C}$  NMR spectrum of compound 9 in  $\text{CD}_3\text{OD}$ .  
**Figure S41.** ESI-MS spectrum of compound 9.  
**Figure S42.**  $^1\text{H}$  NMR spectrum of compound 10 in  $\text{CD}_3\text{OD}$ .  
**Figure S43.**  $^{13}\text{C}$  NMR spectrum of compound 10 in  $\text{CD}_3\text{OD}$ .

**Figure S44.** ESI-MS spectrum of compound **10**.

**Figure S45.**  $^1\text{H}$  NMR spectrum of compound **11** in  $\text{DMSO-}d_6$ .

**Figure S46.**  $^{13}\text{C}$  NMR spectrum of compound **11** in  $\text{CDCl}_3$ .

**Figure S47.** ESI-MS spectrum of compound **11**.

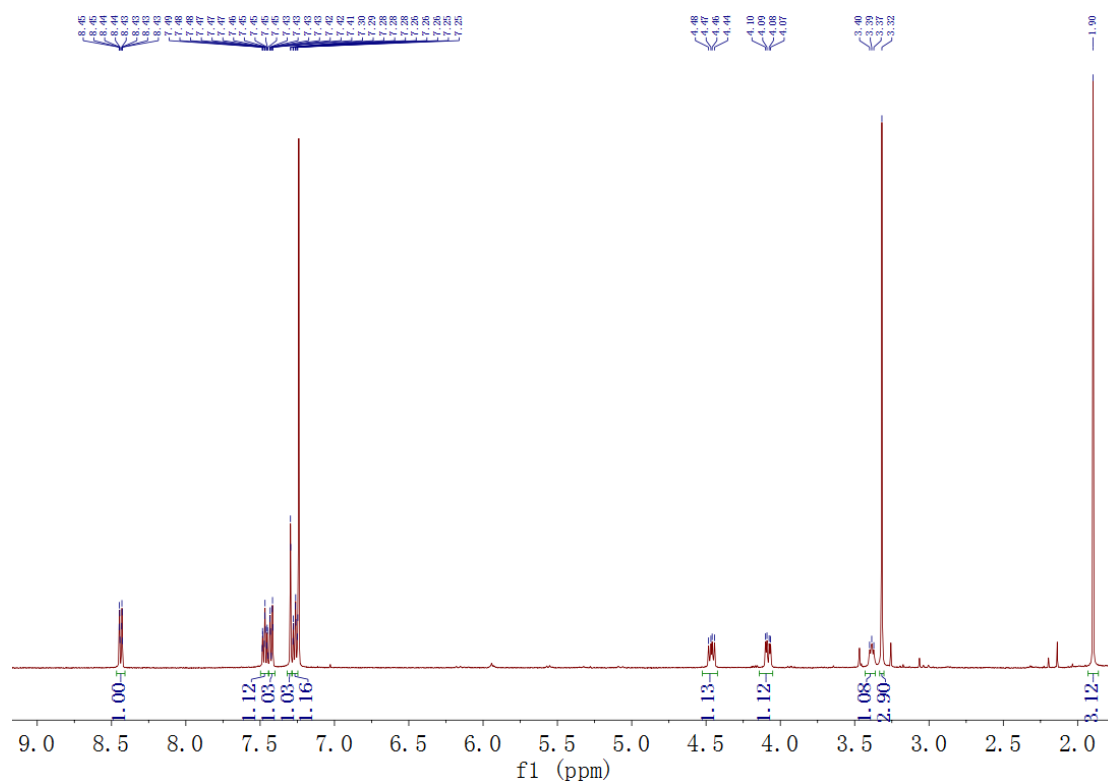

**Figure S1.**  $^1\text{H}$  NMR spectrum of dichotocepin A (**1**) in  $\text{CDCl}_3$ .

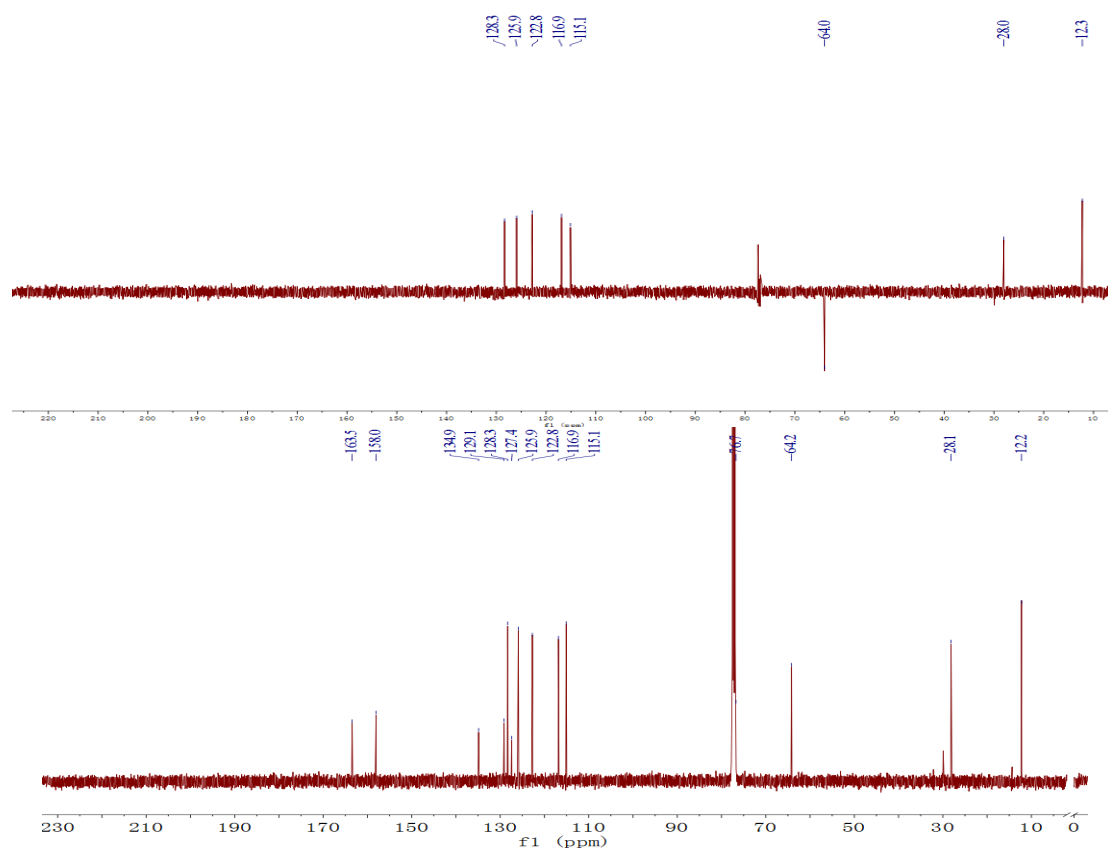

**Figure S2.**  $^{13}\text{C}$  NMR and DEPT135 spectrum of dichotocepin A (**1**) in  $\text{CDCl}_3$ .

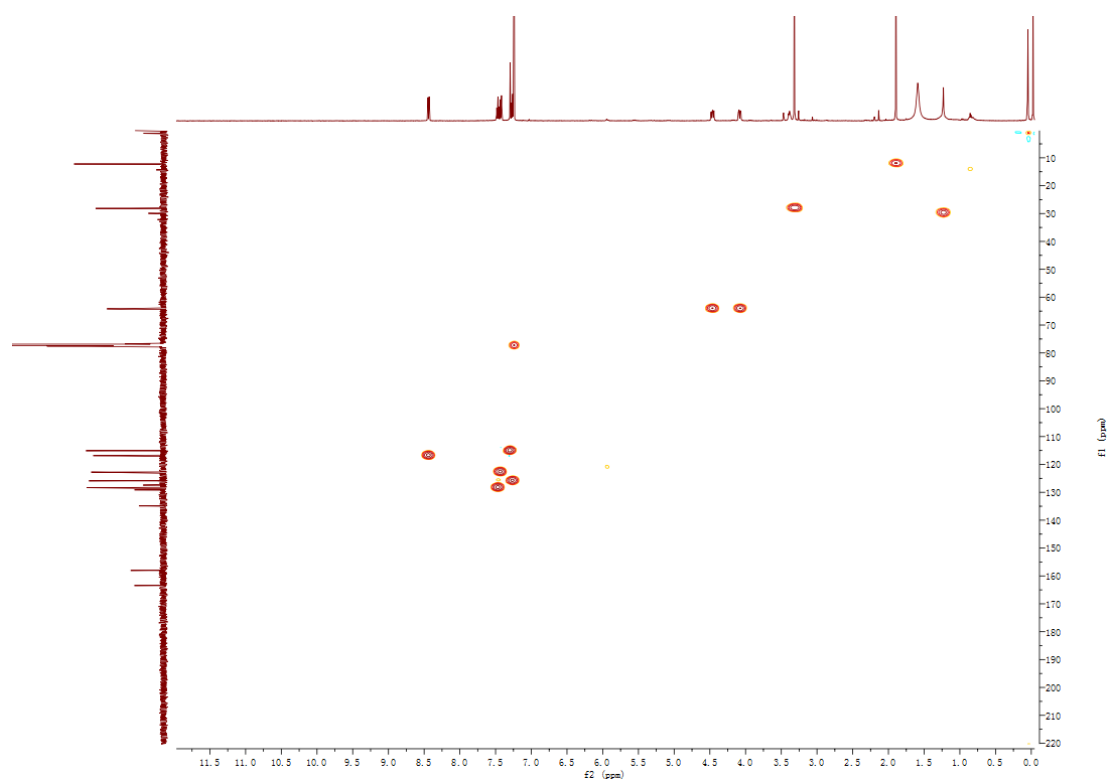

Figure S3. HSQC spectrum of dichotocejpin A (1) in CDCl<sub>3</sub>.

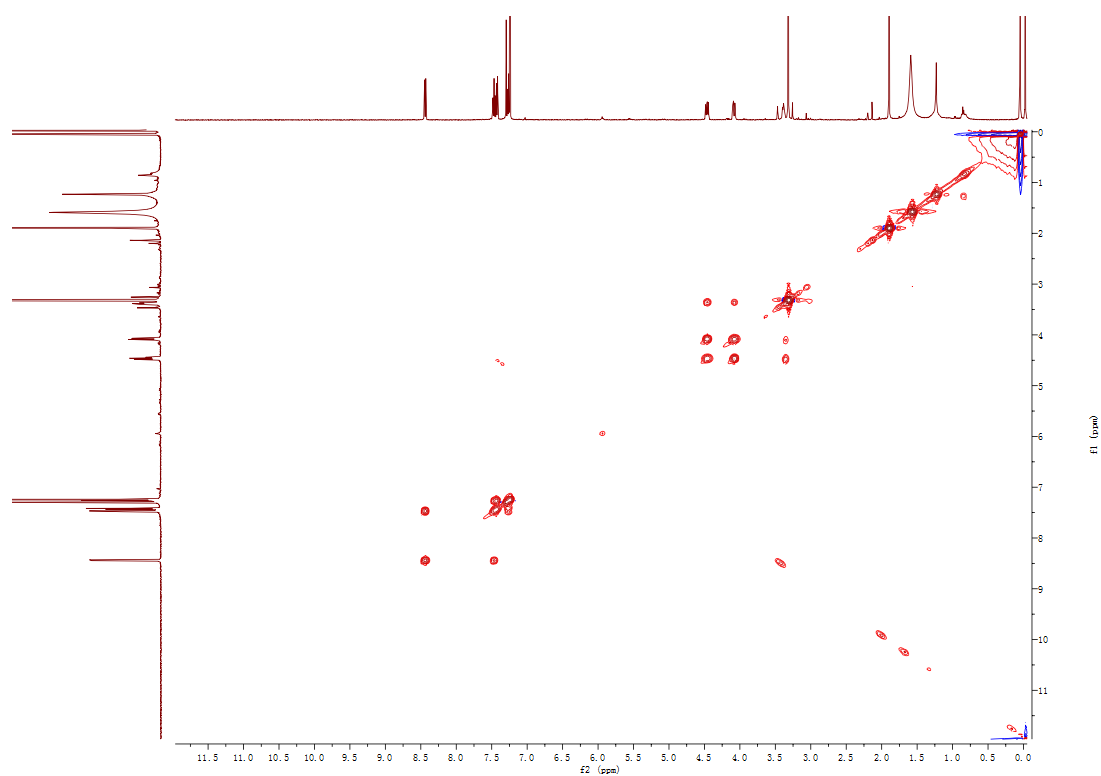

Figure S4. <sup>1</sup>H-<sup>1</sup>H COSY spectrum of dichotocejpin A (1) in CDCl<sub>3</sub>.

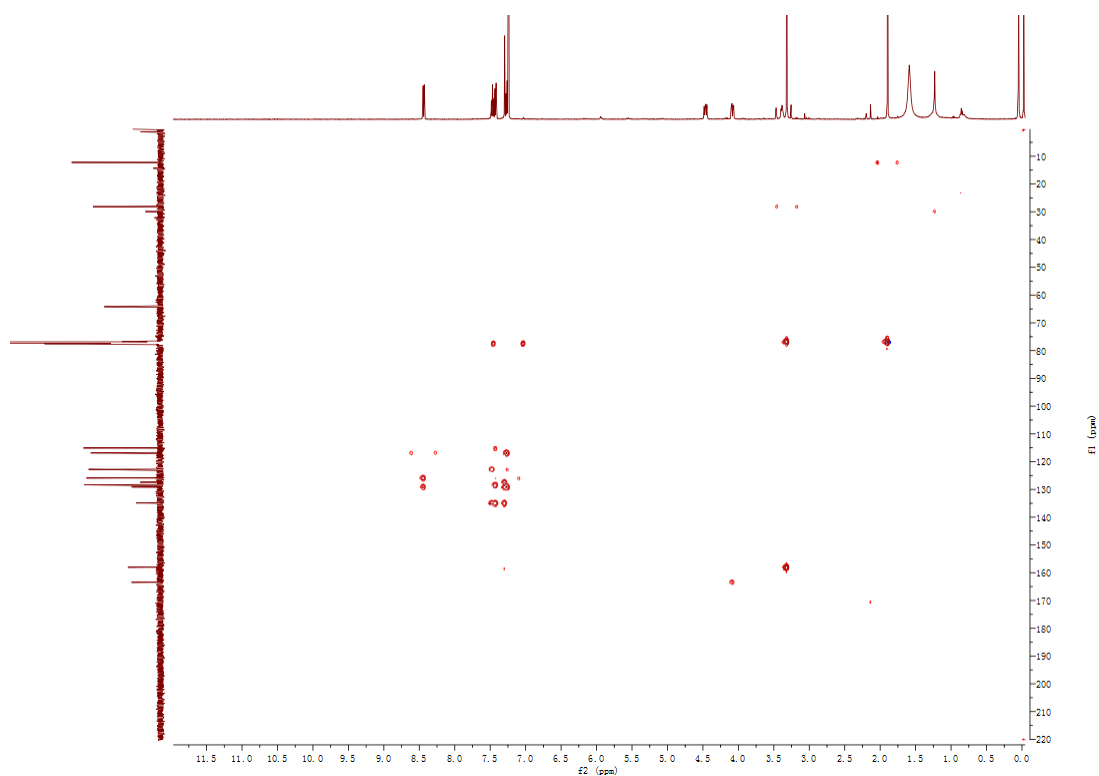Figure S5. HMBC spectrum of dichotocejpina A (1) in CDCl<sub>3</sub>.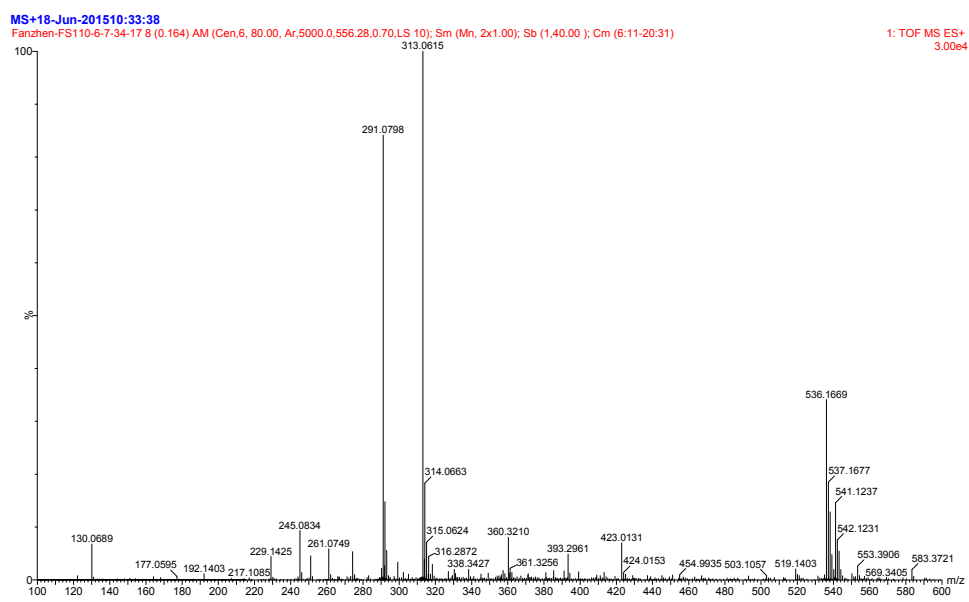

Figure S6. HRESIMS spectrum of dichotocejpina A (1).

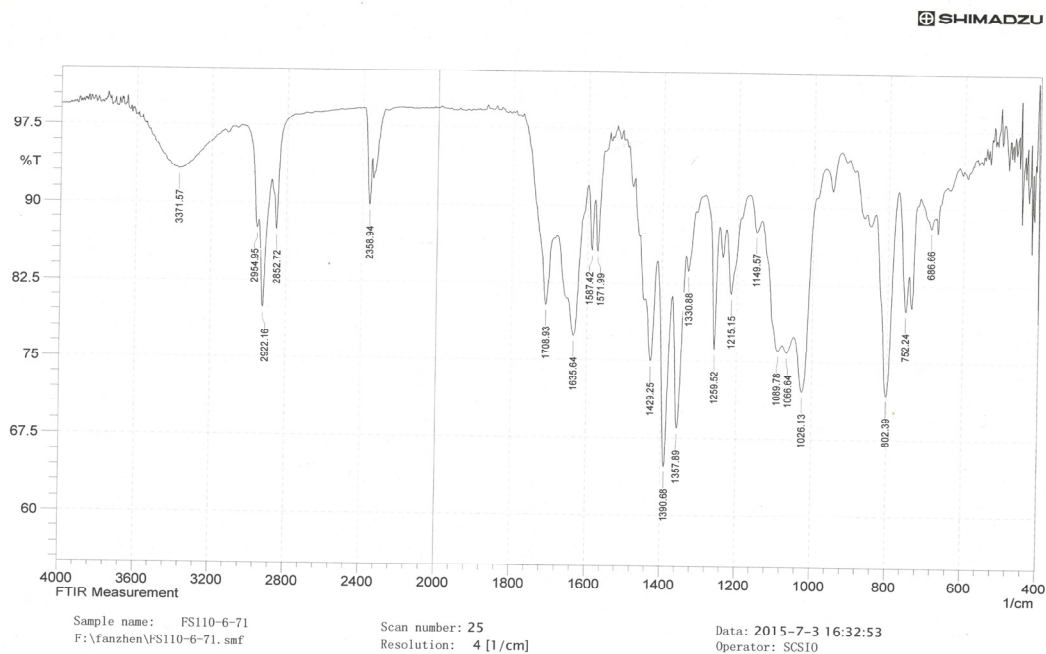

Figure S7. IR spectrum of dichotocepin A (1).

光谱峰值检测报告

2015-07-03 14:56:30

数据集: FS110-6-7-2 - RawData

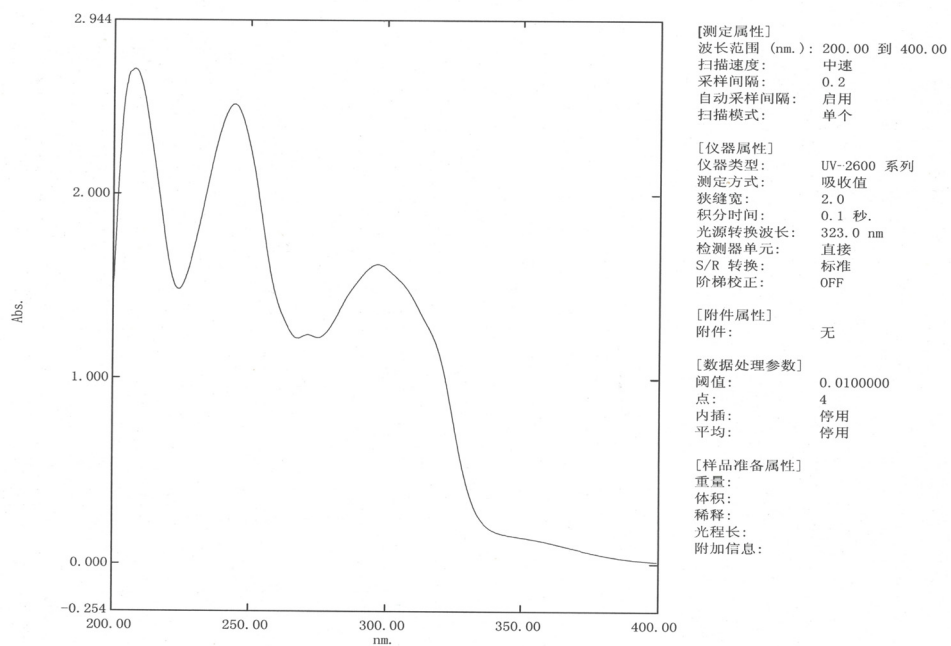

| No. | P/V | 波长 (nm) | 吸收值   | 描述 |
|-----|-----|---------|-------|----|
| 1   | ⊕   | 296.60  | 1.620 |    |
| 2   | ⊕   | 271.40  | 1.237 |    |
| 3   | ⊕   | 244.40  | 2.488 |    |
| 4   | ⊕   | 207.80  | 2.677 |    |
| 5   | ⊕   | 275.00  | 1.222 |    |
| 6   | ⊕   | 267.60  | 1.219 |    |
| 7   | ⊕   | 224.20  | 1.484 |    |

Figure S8. UV spectrum of dichotocepin A (1).

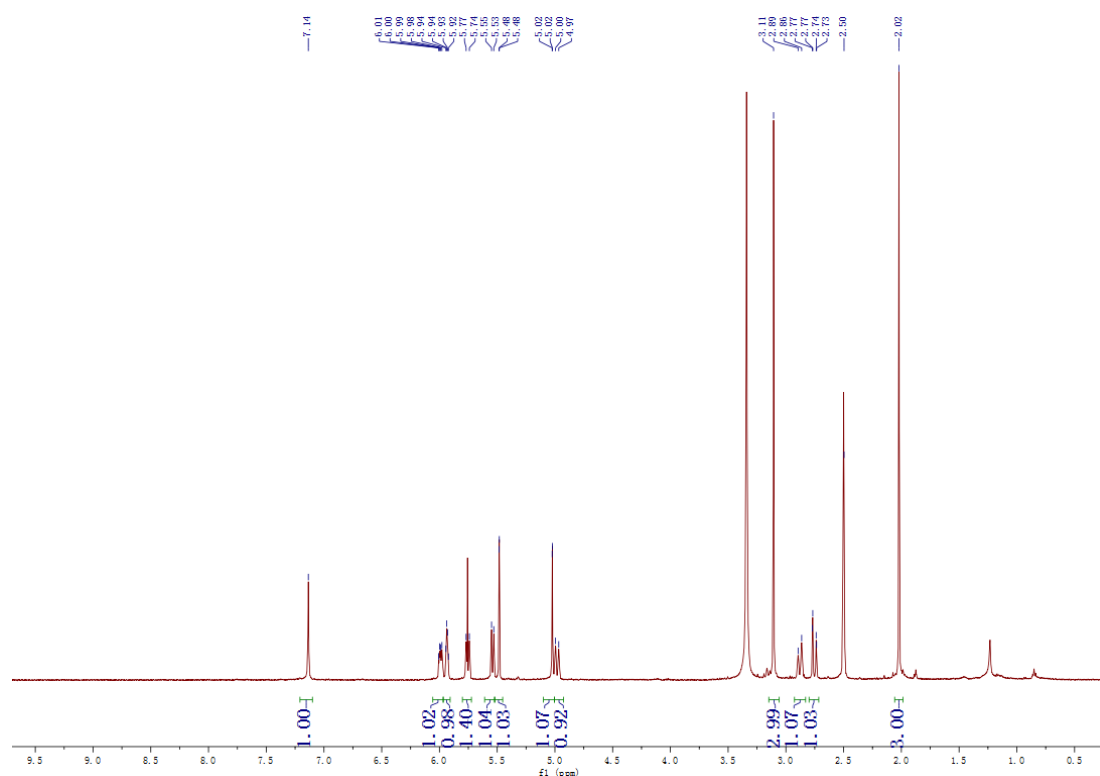

Figure S9. <sup>1</sup>H NMR spectrum of dichotocejin B (2) in DMSO-*d*<sub>6</sub>.

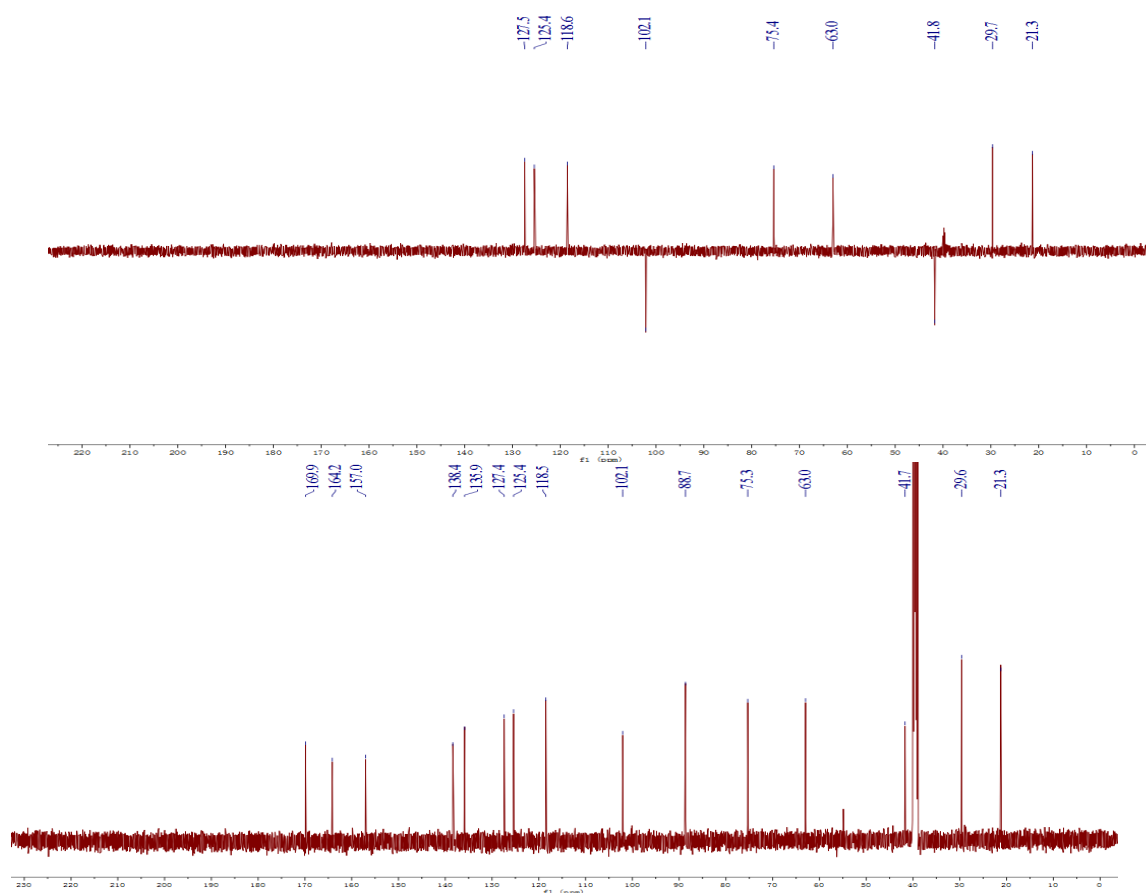

Figure S10. <sup>13</sup>C NMR and DEPT135 spectra of dichotocejin B (2) in DMSO-*d*<sub>6</sub>.

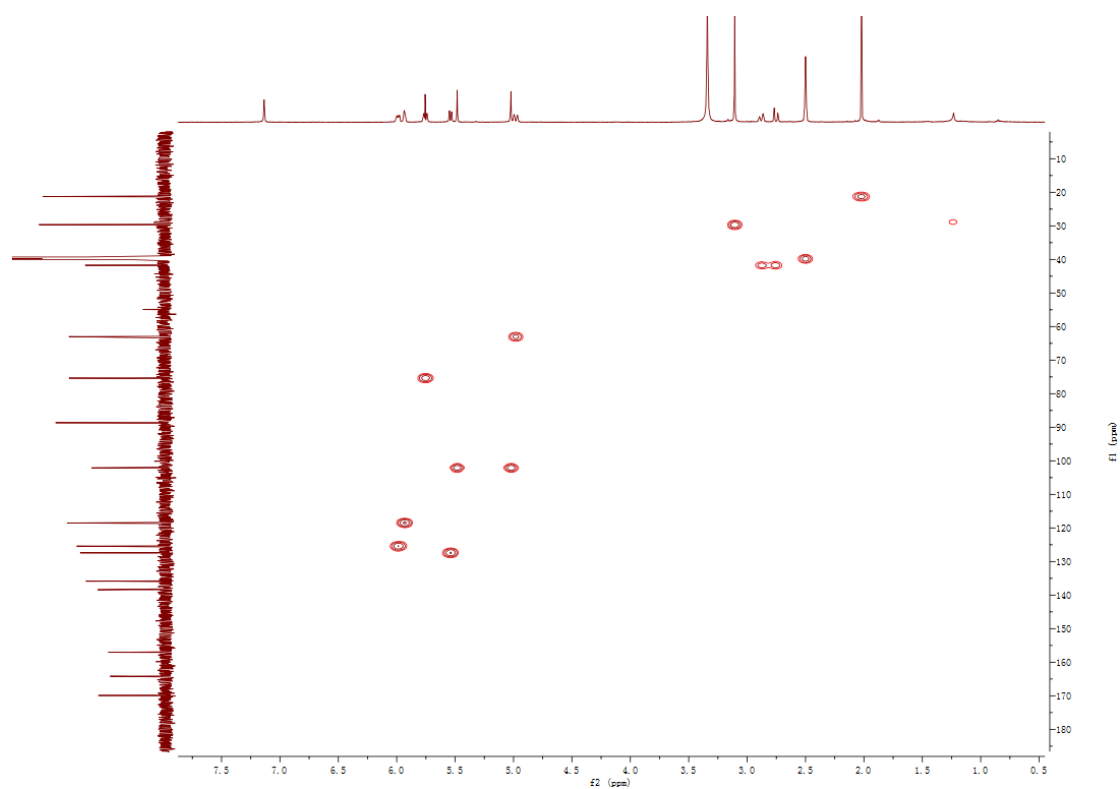

Figure S11. HSQC spectrum of dichotocejpina B (2) in DMSO- $d_6$ .

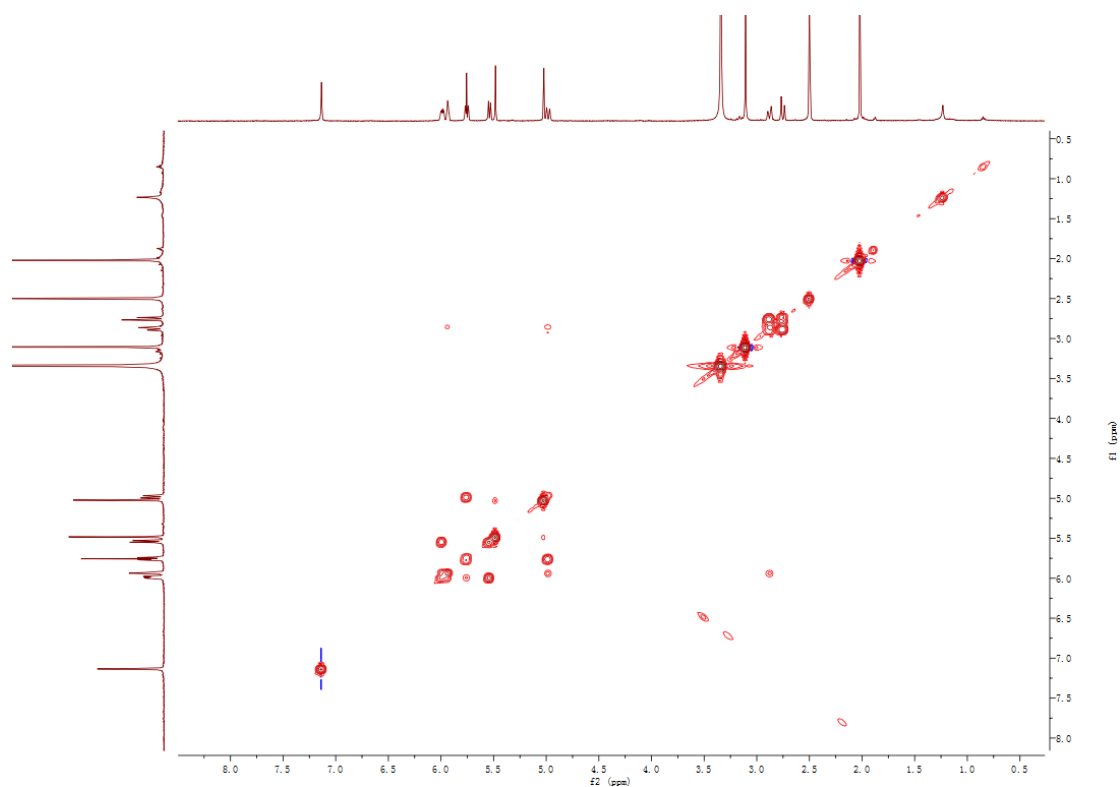

Figure S12.  $^1\text{H}$ - $^1\text{H}$  COSY spectrum of dichotocejpina B (2) in DMSO- $d_6$ .

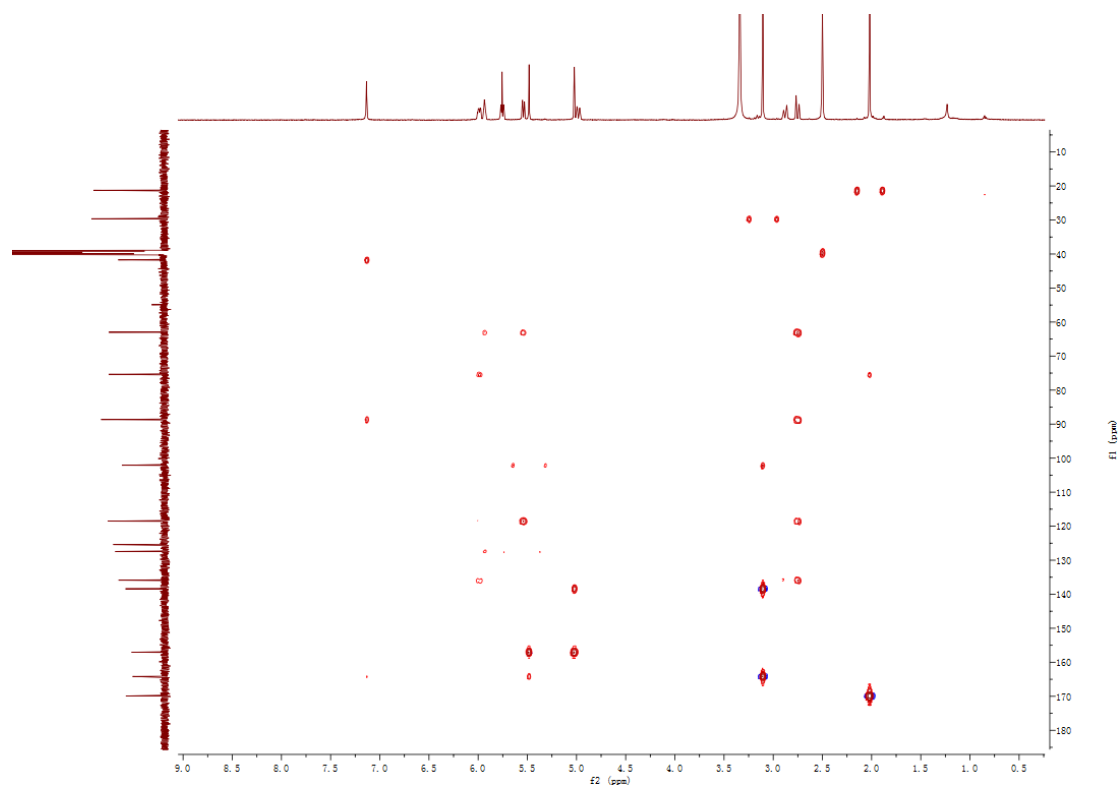

Figure S13. HMBC spectrum of dichotocepin B (2) in DMSO-*d*<sub>6</sub>.

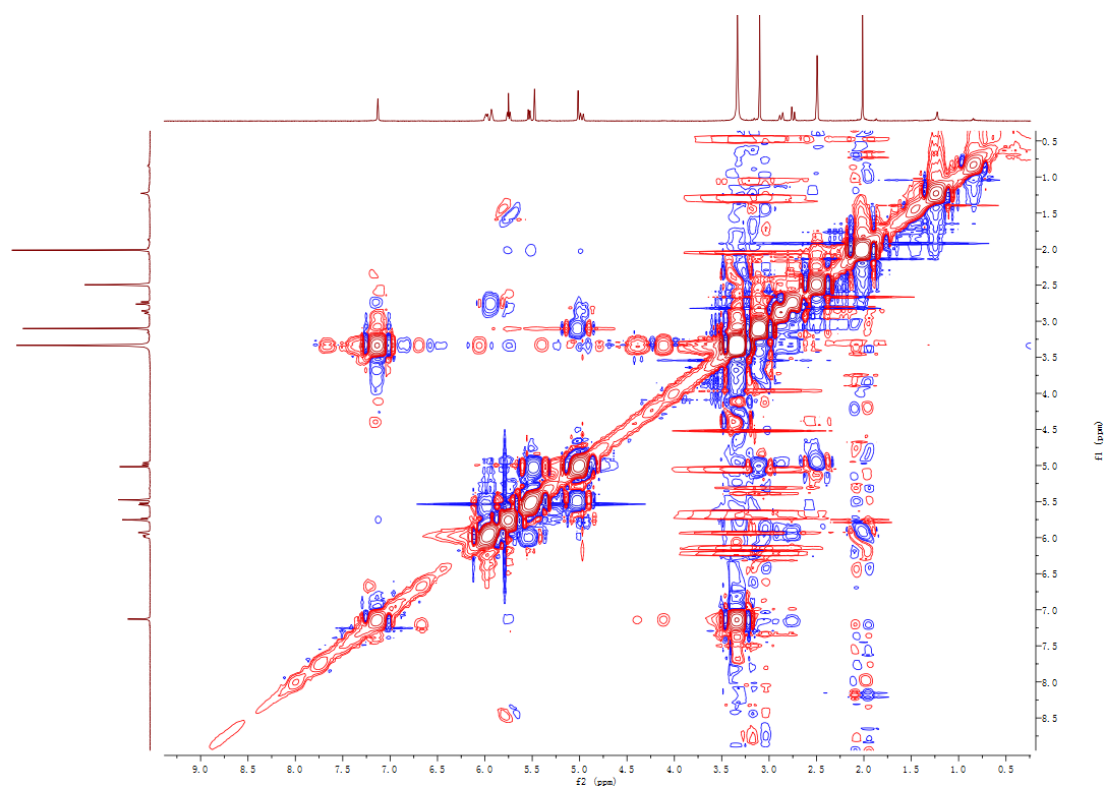

Figure S14. NOESY spectrum of dichotocepin B (2) in DMSO-*d*<sub>6</sub>.



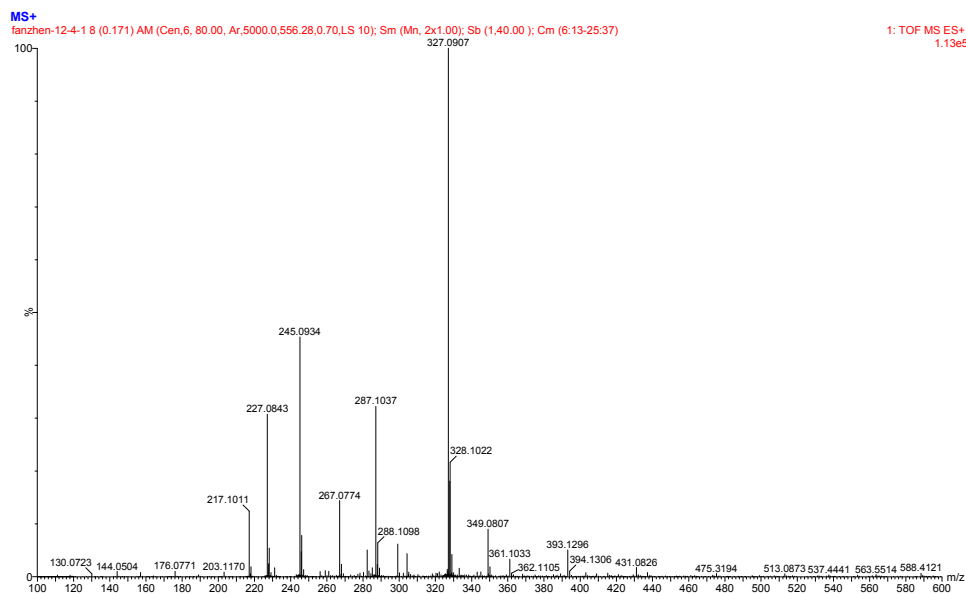

Figure S15. HRESIMS spectrum of dichotocepin B (2).

SHIMADZU

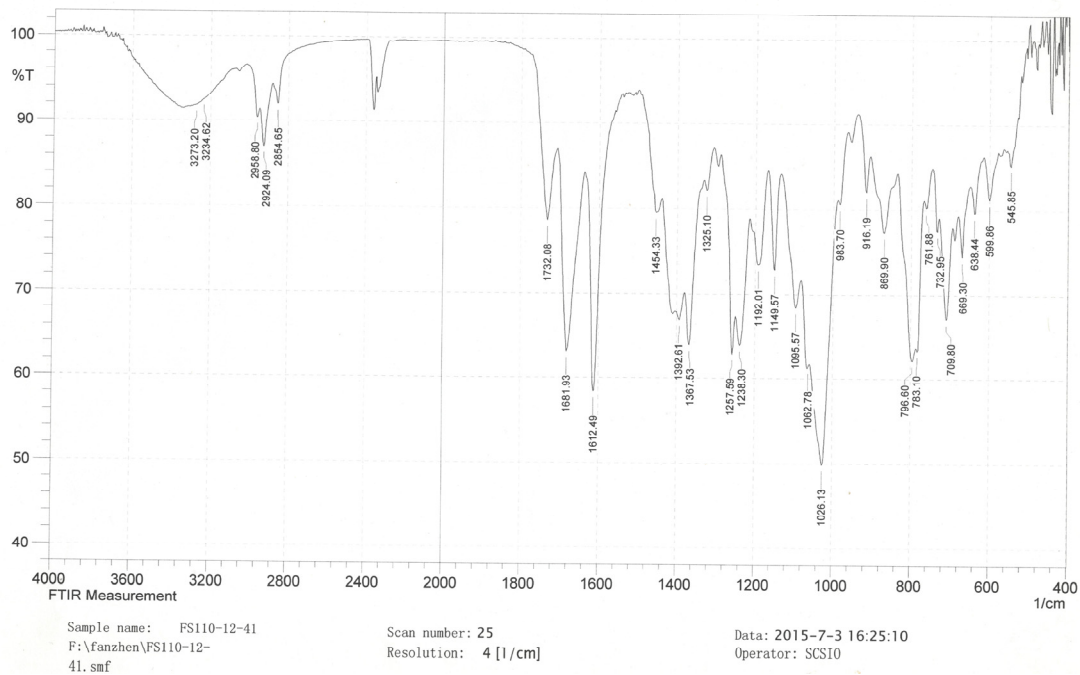

Figure S16. IR spectrum of dichotocepin A (2).

## 光谱峰值检测报告

2015-07-03 15:12:08

数据集: FS110-12-4 - RawData

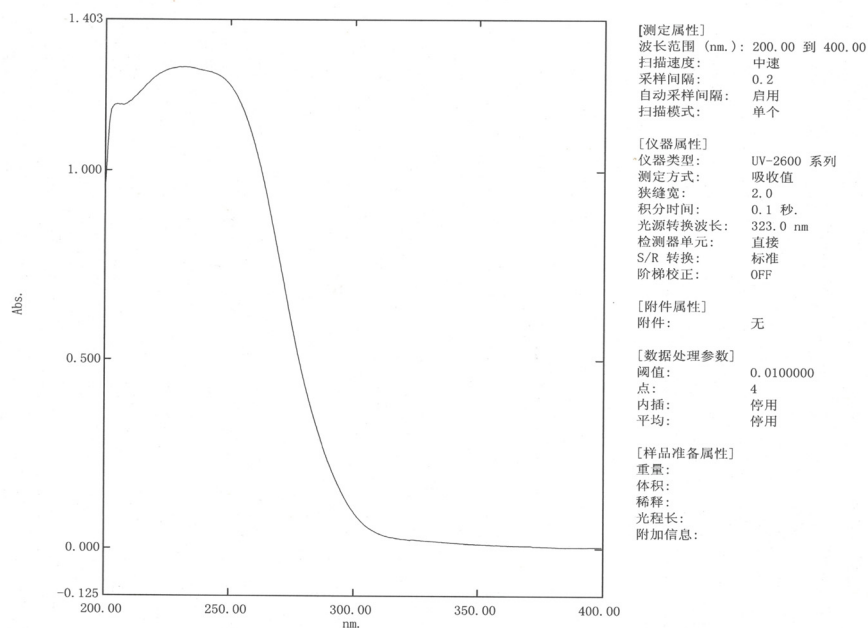

Figure S17. UV spectrum of dichotocepin A (2).

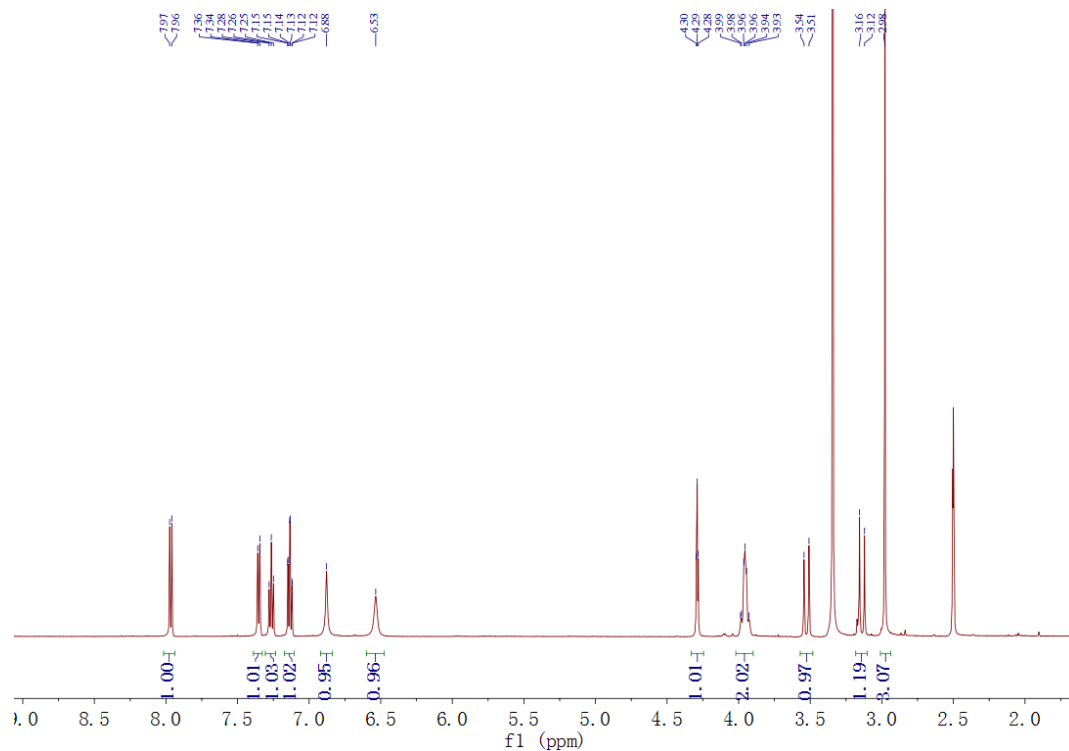Figure S18.  $^1\text{H}$  NMR spectrum of dichotocepin C (3) in  $\text{DMSO-}d_6$ .

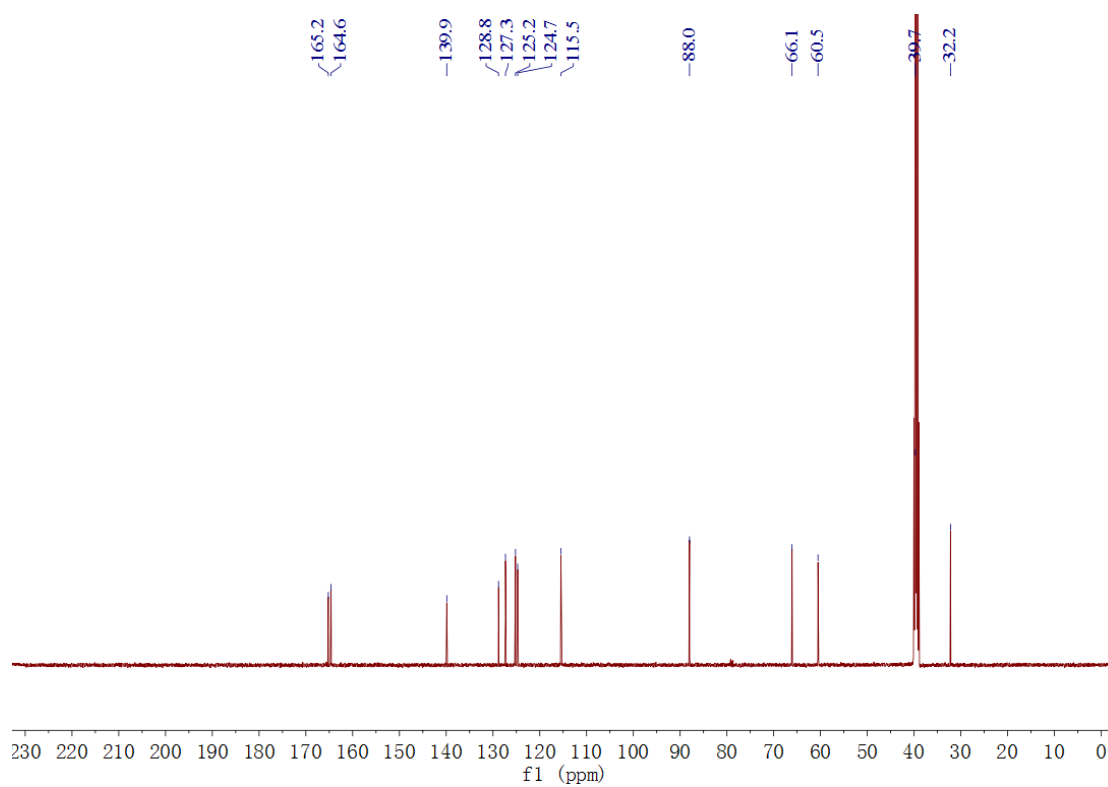

Figure S19. <sup>13</sup>C NMR spectra of dichotocejpin C (3) in DMSO-*d*<sub>6</sub>.

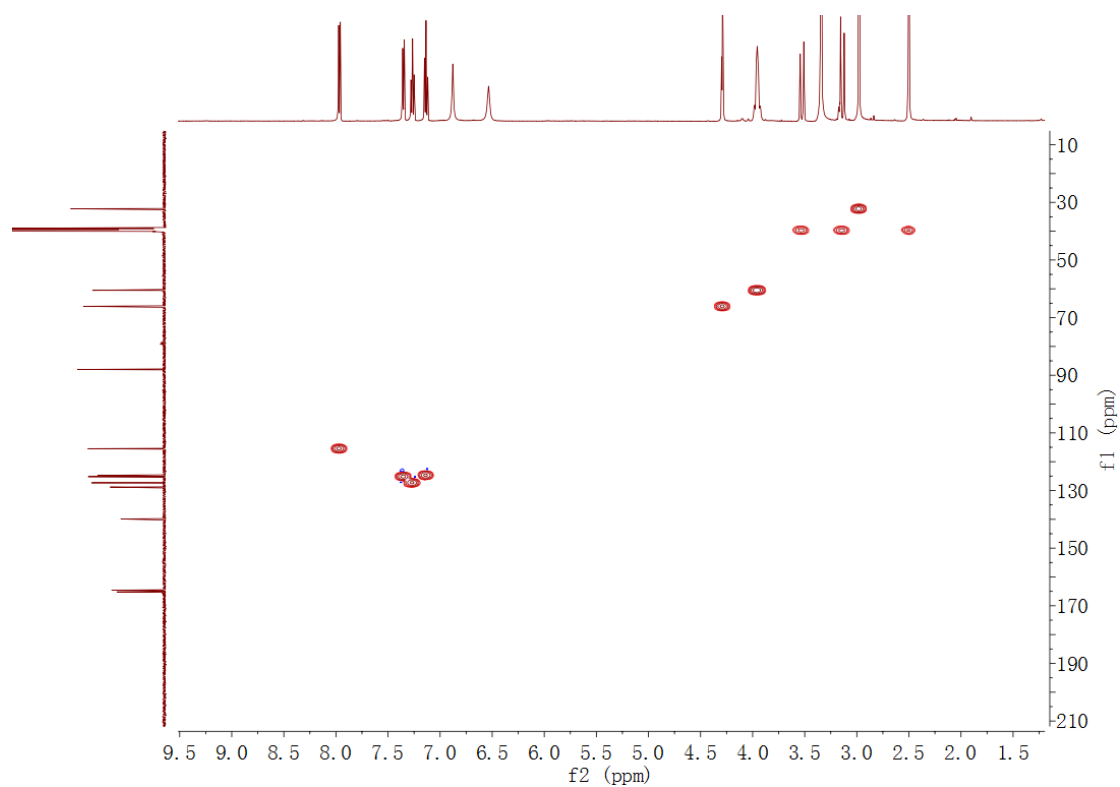

Figure S20. HSQC spectrum of dichotocejpin C (3) in DMSO-*d*<sub>6</sub>.

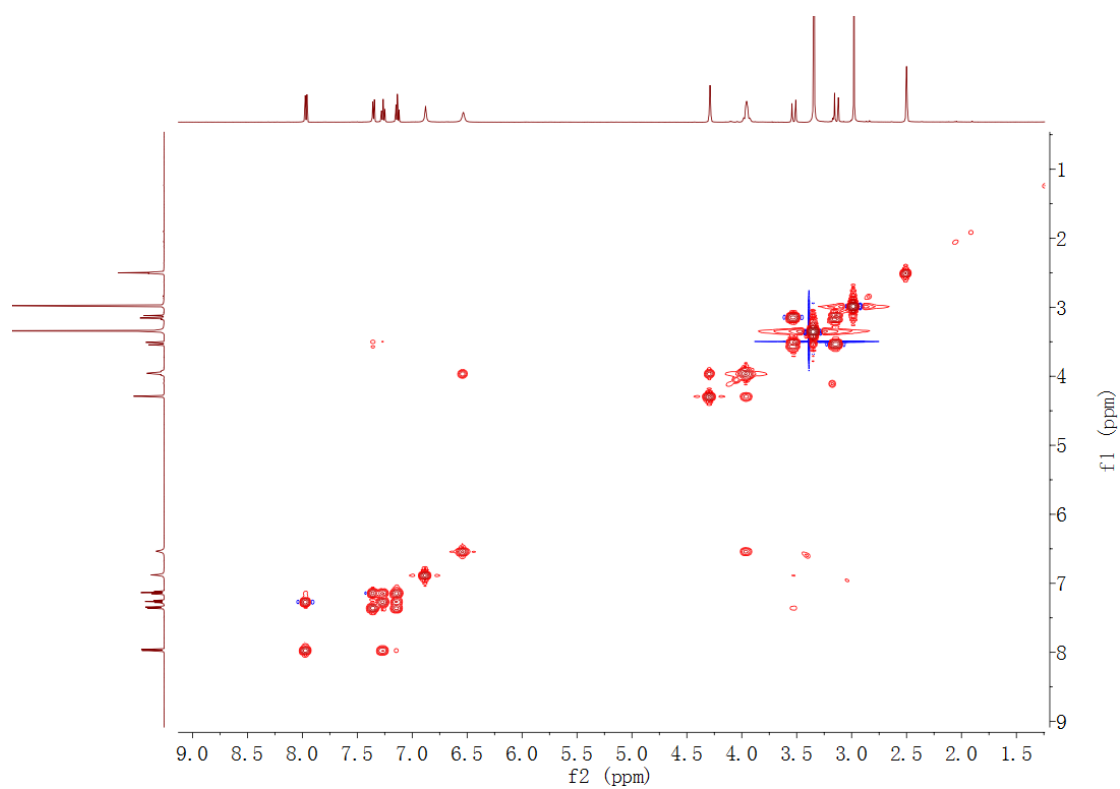

**Figure S21.**  $^1\text{H}$ - $^1\text{H}$  COSY spectrum of dichotocejpin C (3) in  $\text{DMSO-}d_6$ .

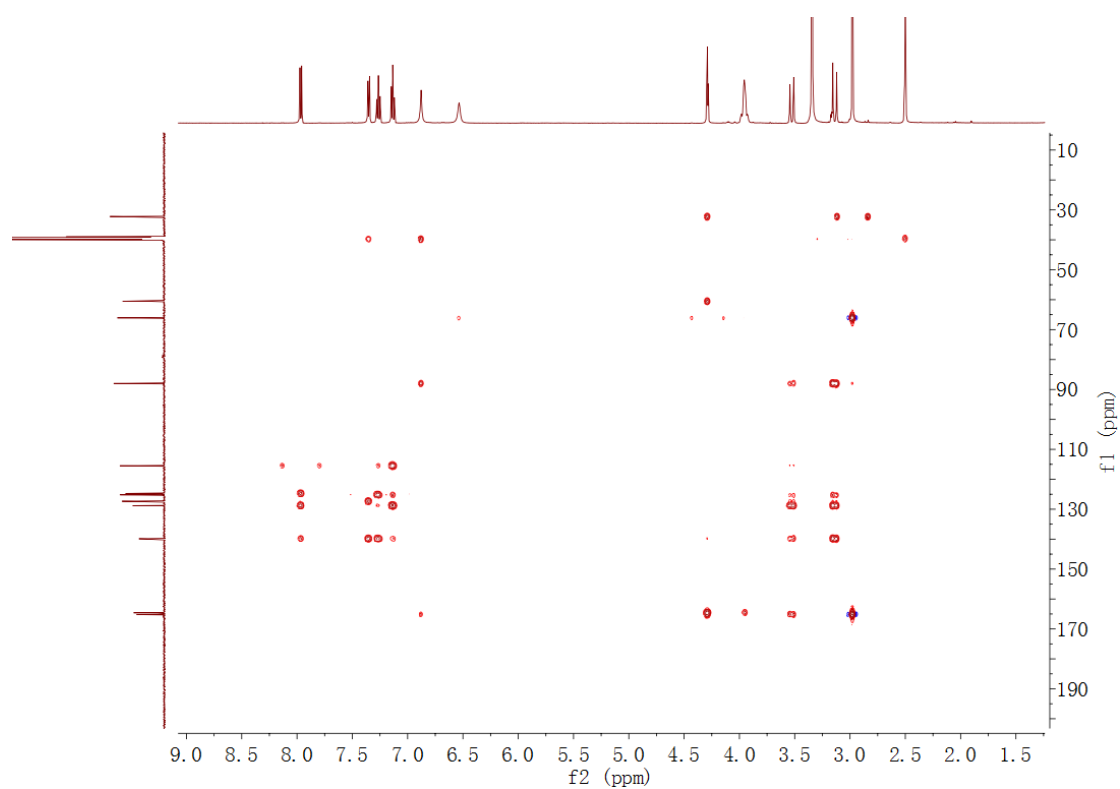

**Figure S22.** HMBC spectrum of dichotocejpin C (3) in  $\text{DMSO-}d_6$ .

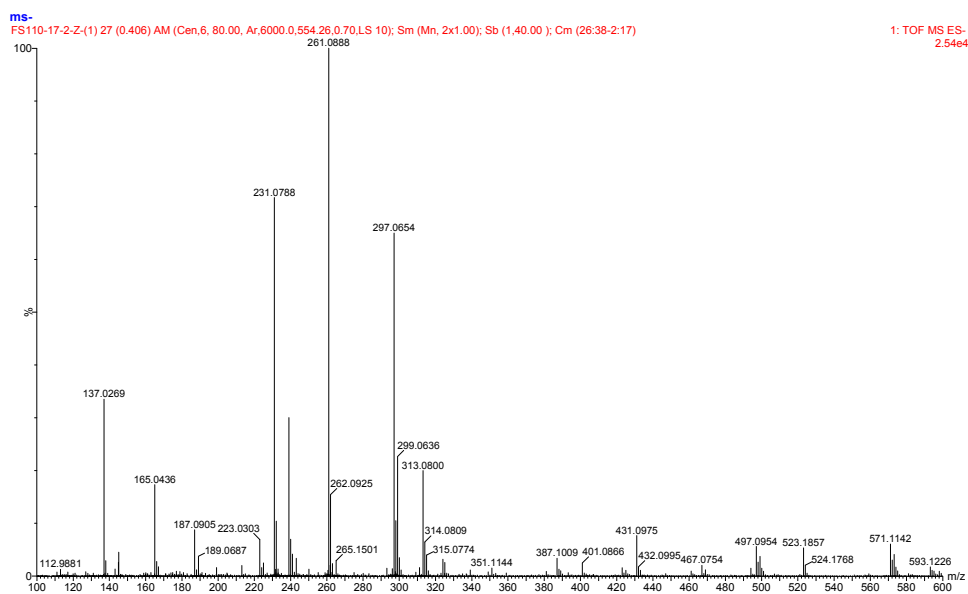

Figure S23. HRESIMS spectrum of dichotocepin C (3).

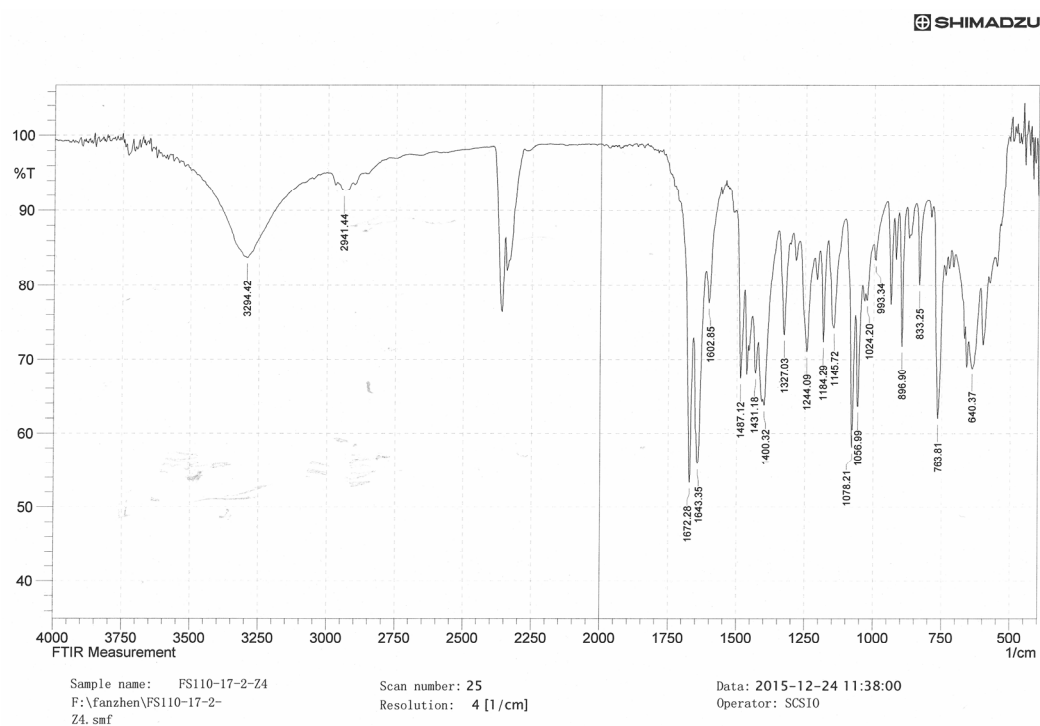

Figure S24. IR spectrum of dichotocepin A (3).

## 光谱峰值检测报告

2015-12-24 09:56:58

数据集: FS110-17-2-Z 25ug - RawData

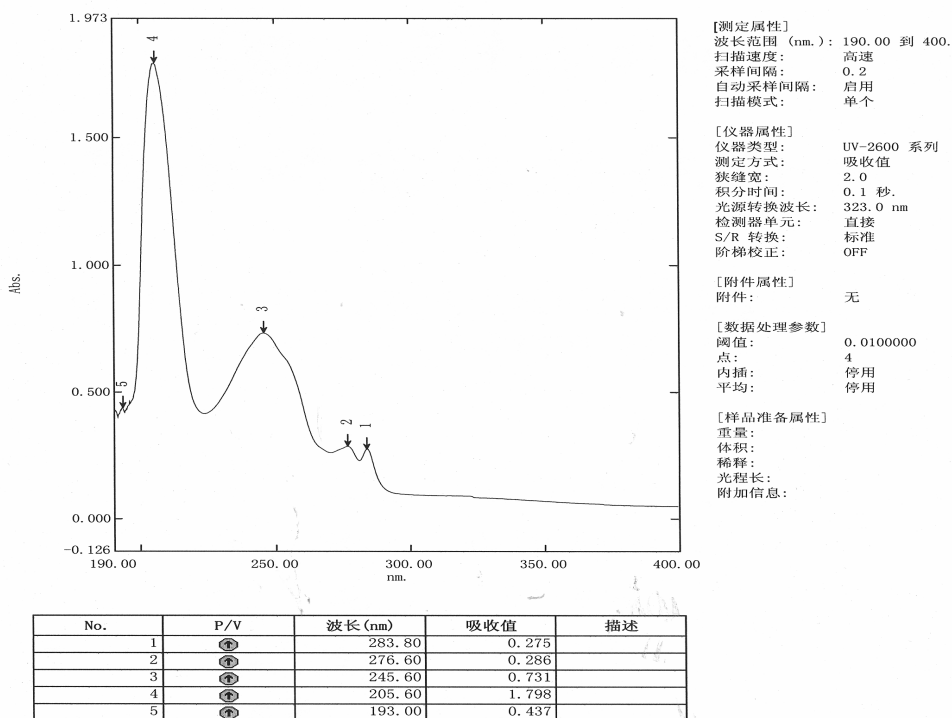

Figure S25. UV spectrum of dichotocepin A (3).

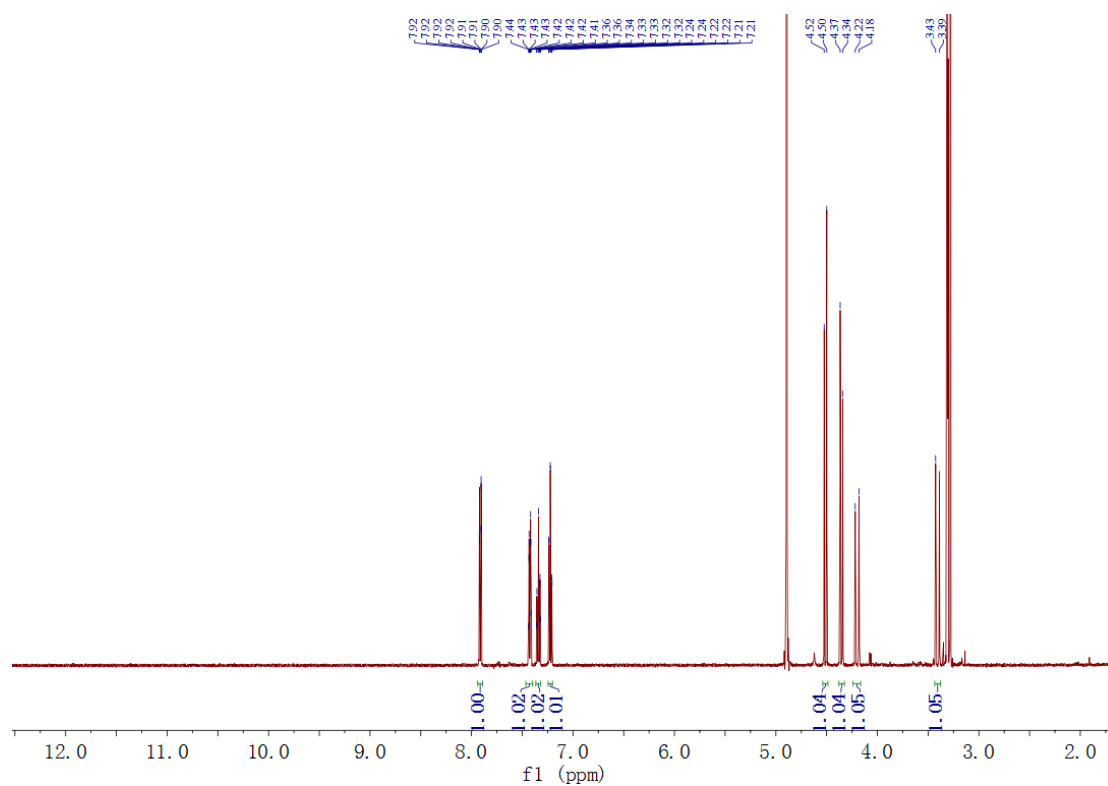Figure S26.  $^1\text{H}$  NMR spectrum of compound 4 in  $\text{CD}_3\text{OD}$ .

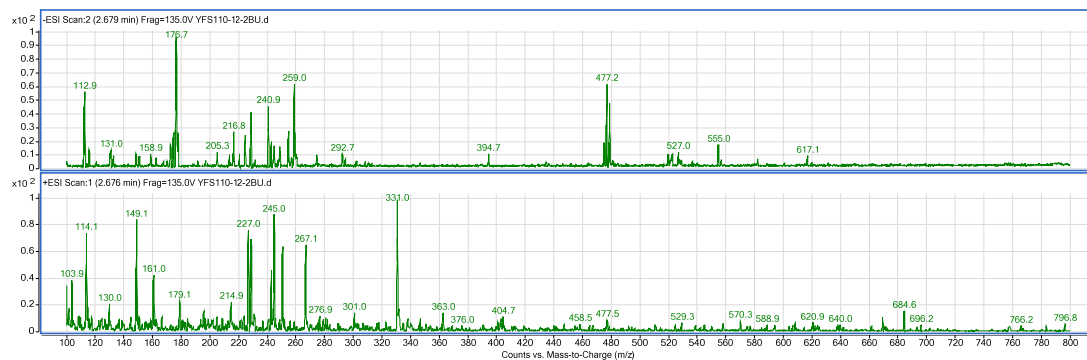

Figure S27. ESI-MS spectrum of compound 4.

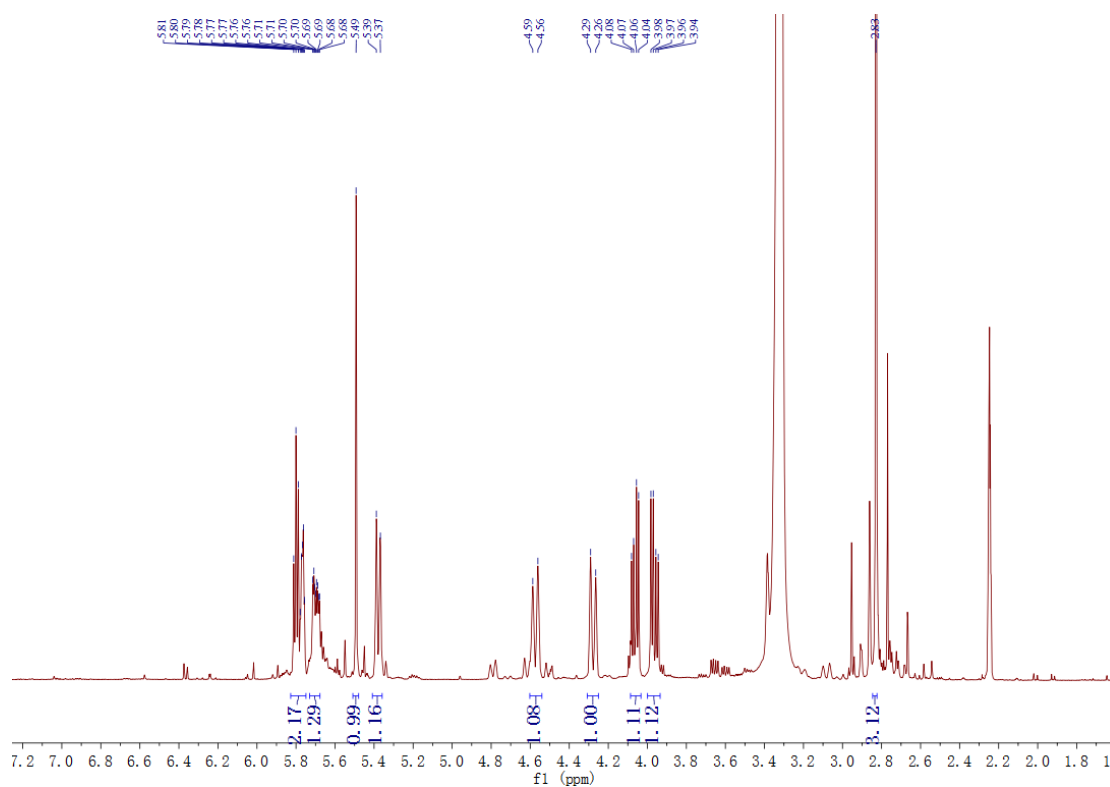Figure S28.  $^1\text{H}$  NMR spectrum of compound 5 in  $\text{CD}_3\text{OD}$ .

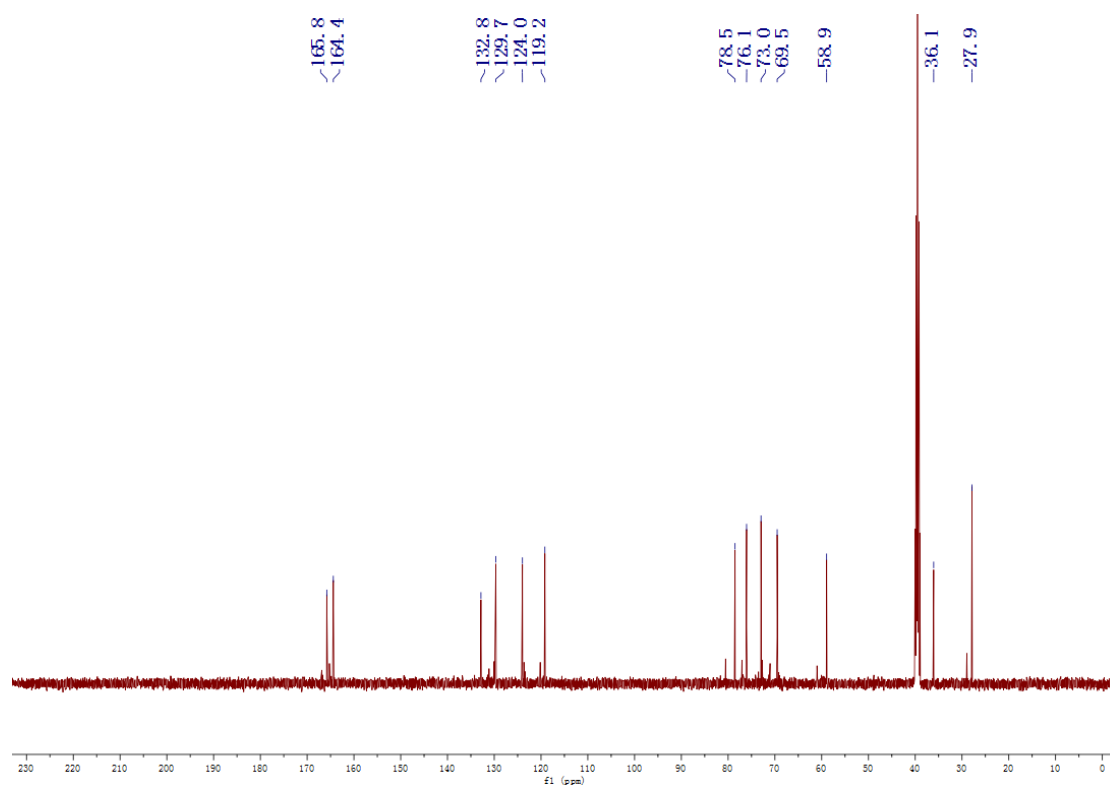Figure S29. <sup>13</sup>C NMR spectrum of compound 5 in CD<sub>3</sub>OD.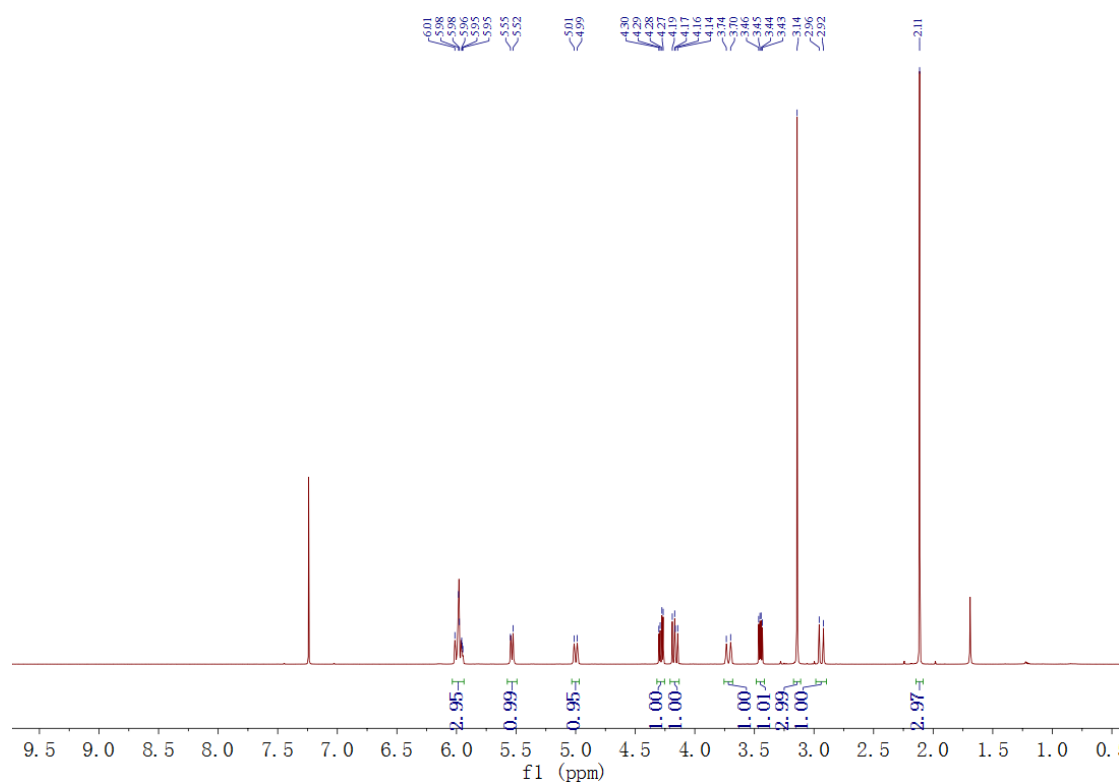Figure S30. <sup>1</sup>H NMR spectrum of compound 6 in CDCl<sub>3</sub>.



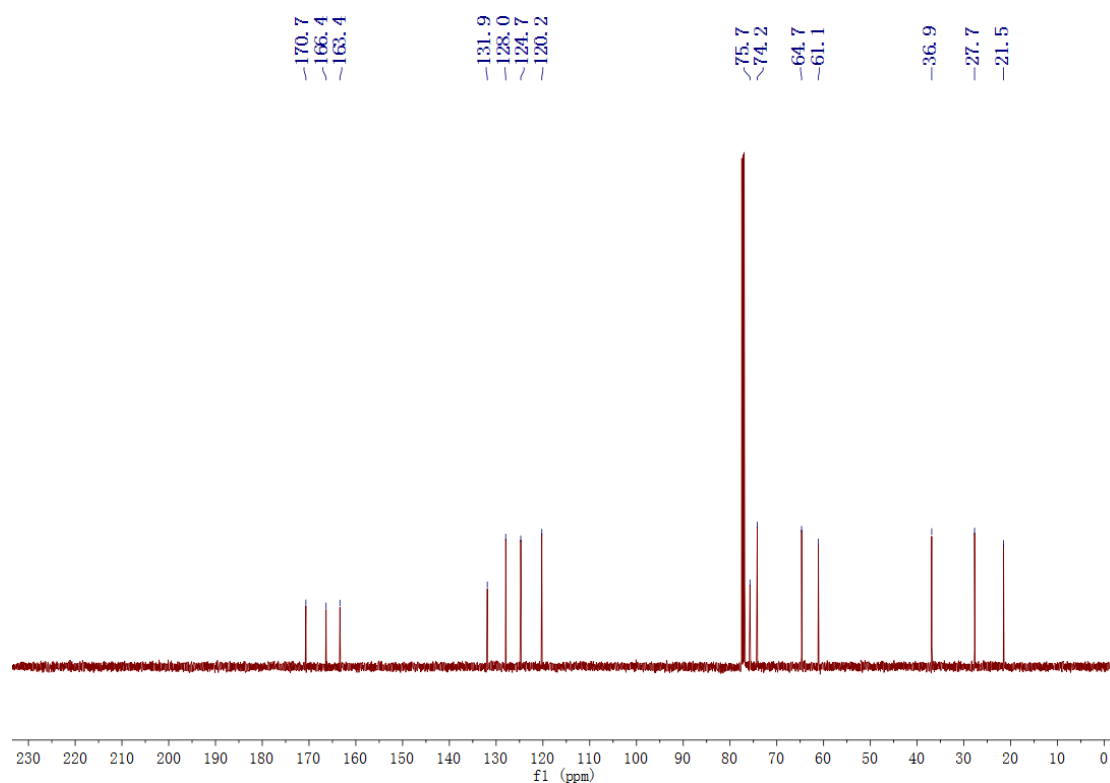

Figure S31.  $^{13}\text{C}$  NMR spectrum of compound **6** in  $\text{CDCl}_3$ .

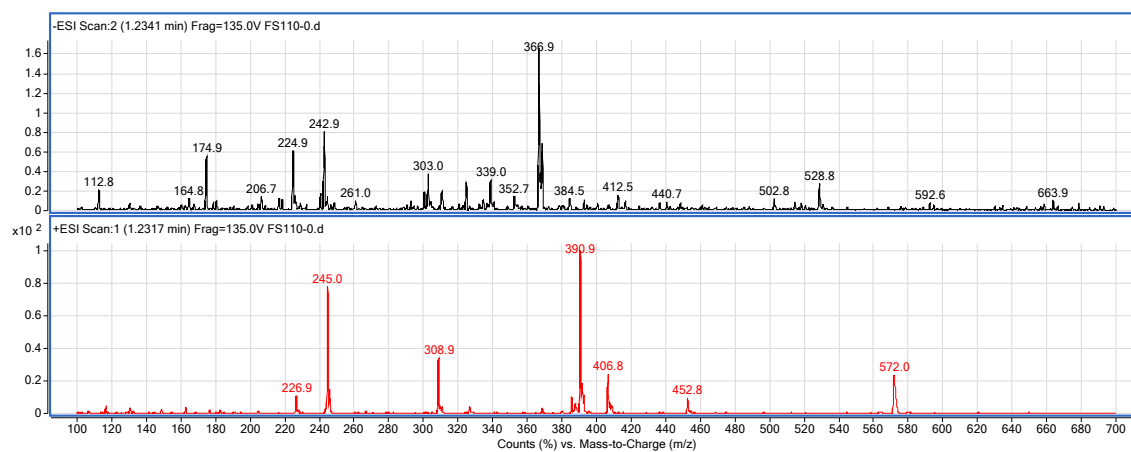

Figure S32. ESI-MS spectrum of compound **6**.

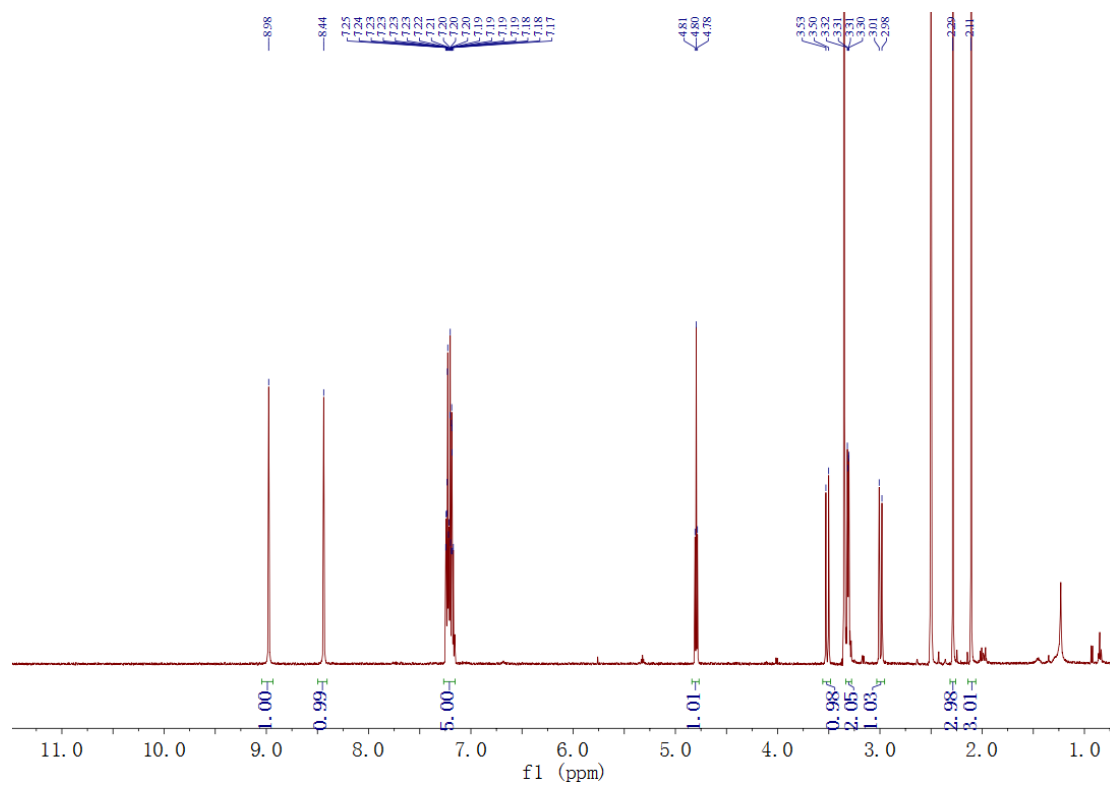

Figure S33.  $^1\text{H}$  NMR spectrum of compound 7 in  $\text{DMSO}-d_6$ .

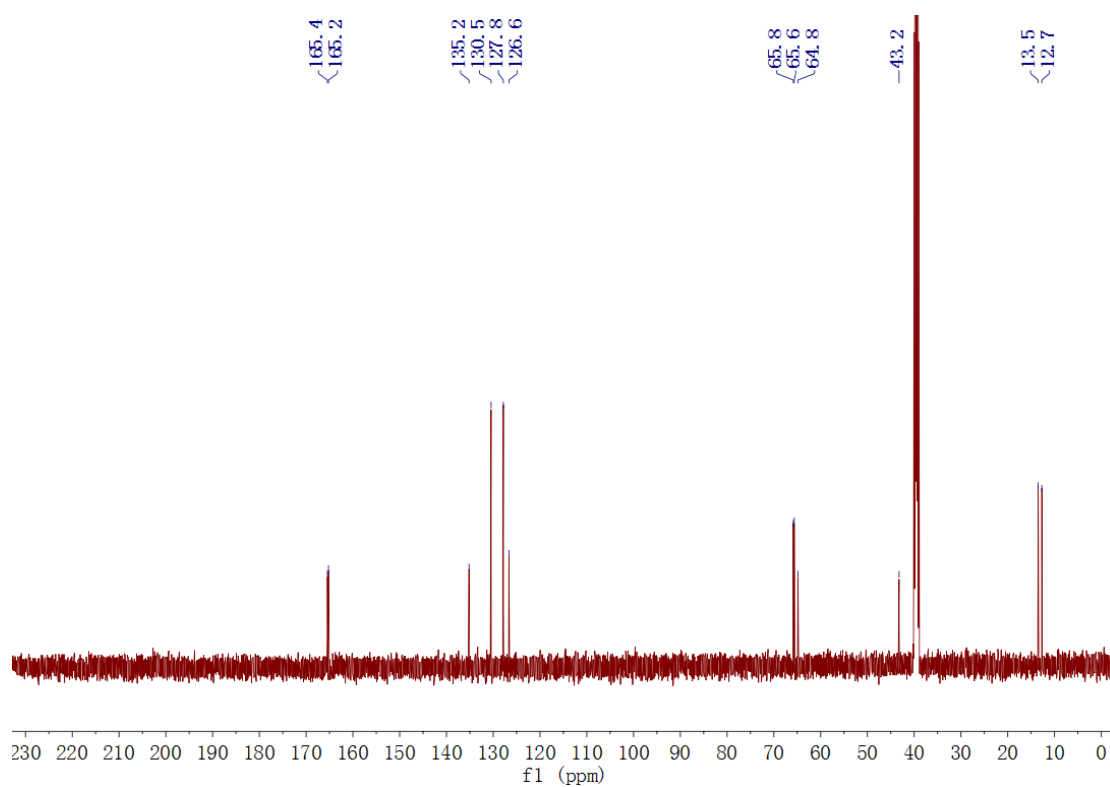

Figure S34.  $^{13}\text{C}$  NMR spectrum of compound 7 in  $\text{DMSO}-d_6$ .

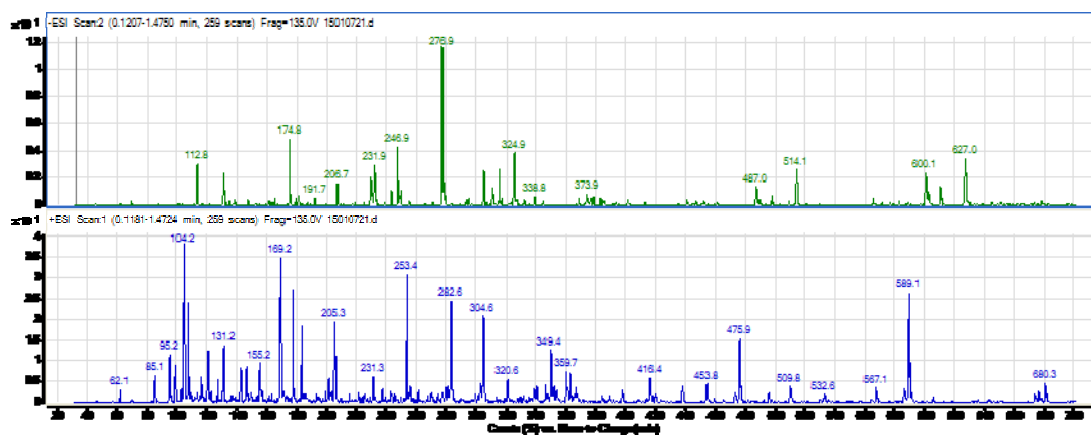

Figure S35. ESI-MS spectrum of compound 7.

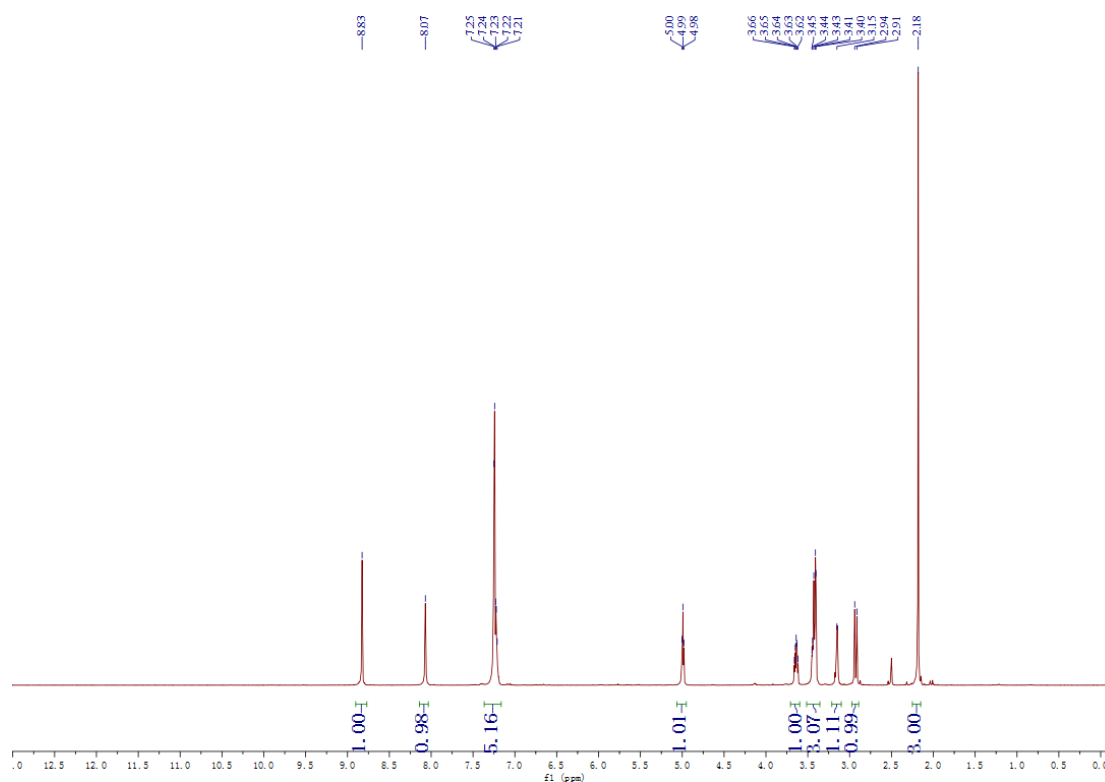Figure S36.  $^1\text{H}$  NMR spectrum of compound 8 in  $\text{DMSO-}d_6$ .

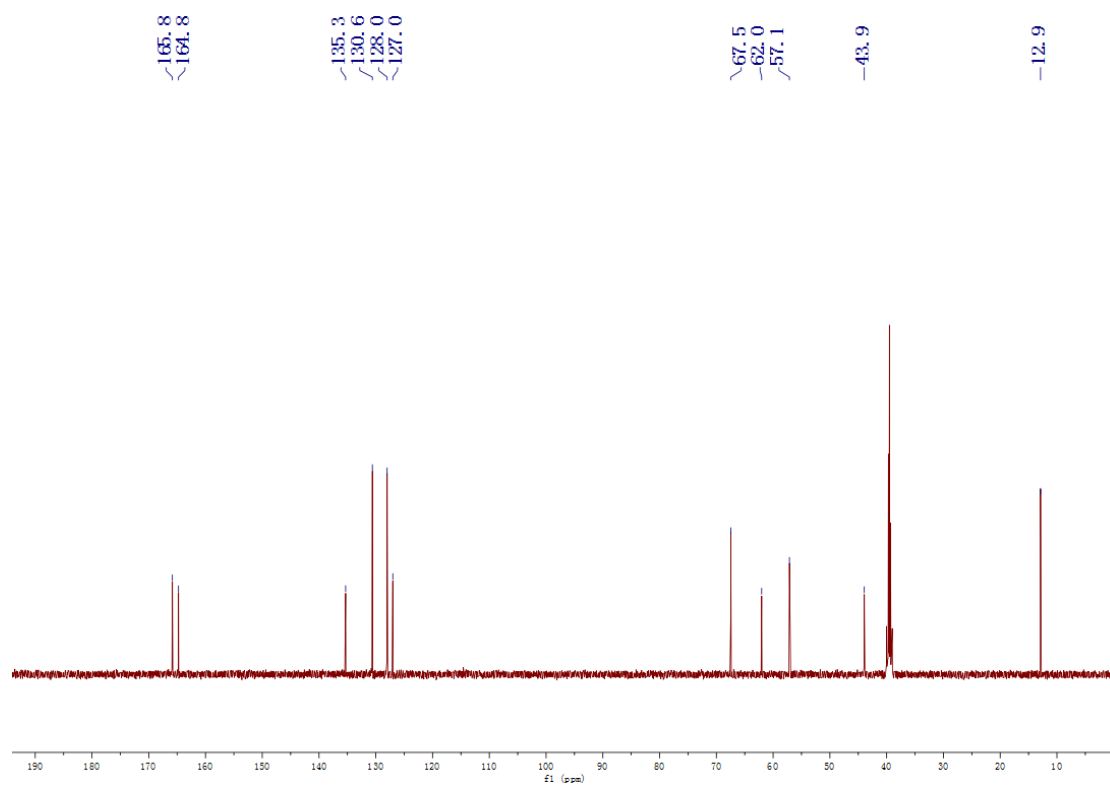

Figure S37.  $^{13}\text{C}$  NMR spectrum of compound 8 in  $\text{DMSO-}d_6$ .

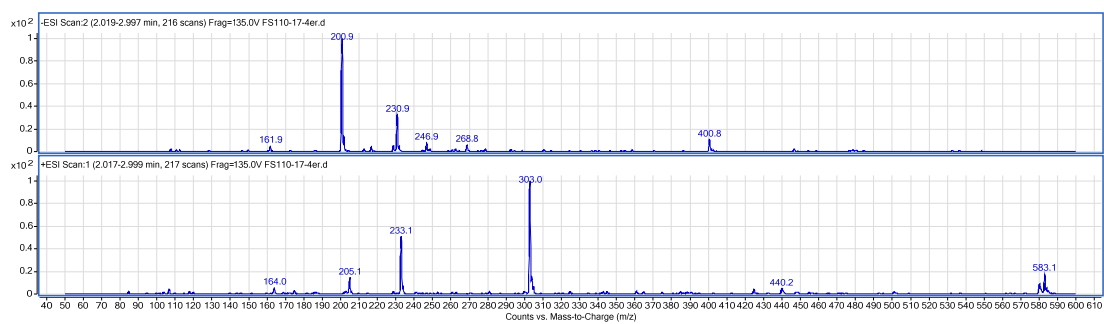

Figure S38. ESI-MS spectrum of compound 8.

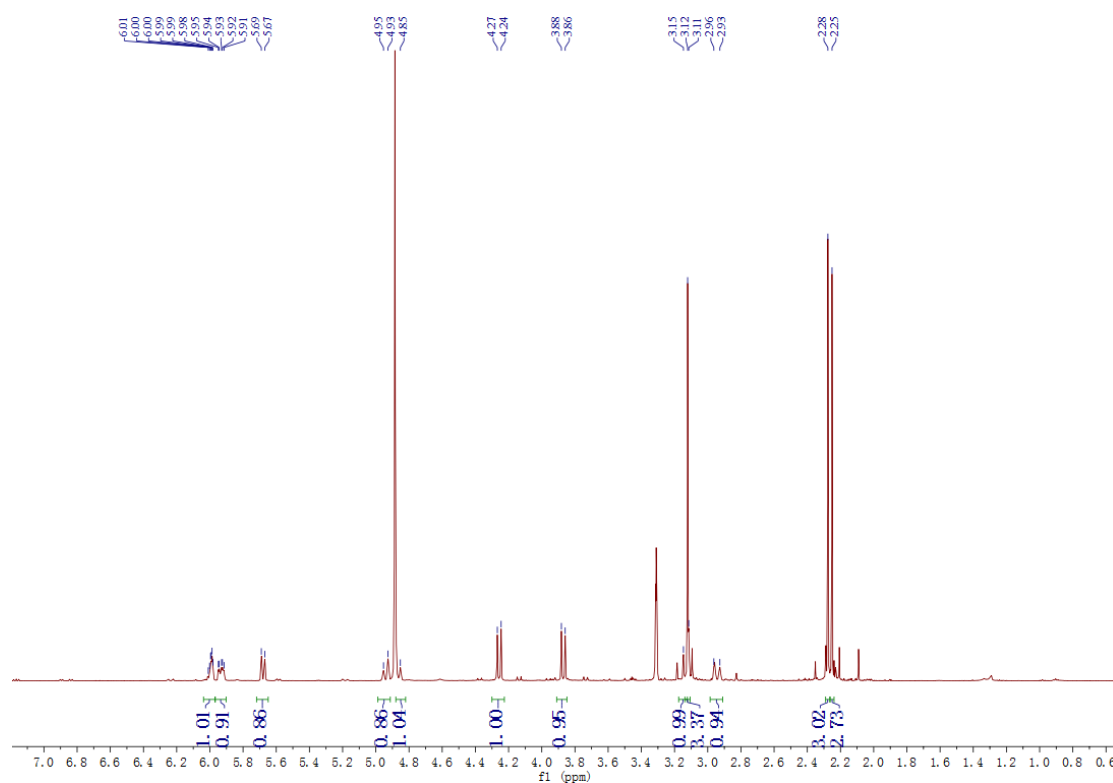

Figure S39. <sup>1</sup>H NMR spectrum of compound 9 in CD<sub>3</sub>OD.

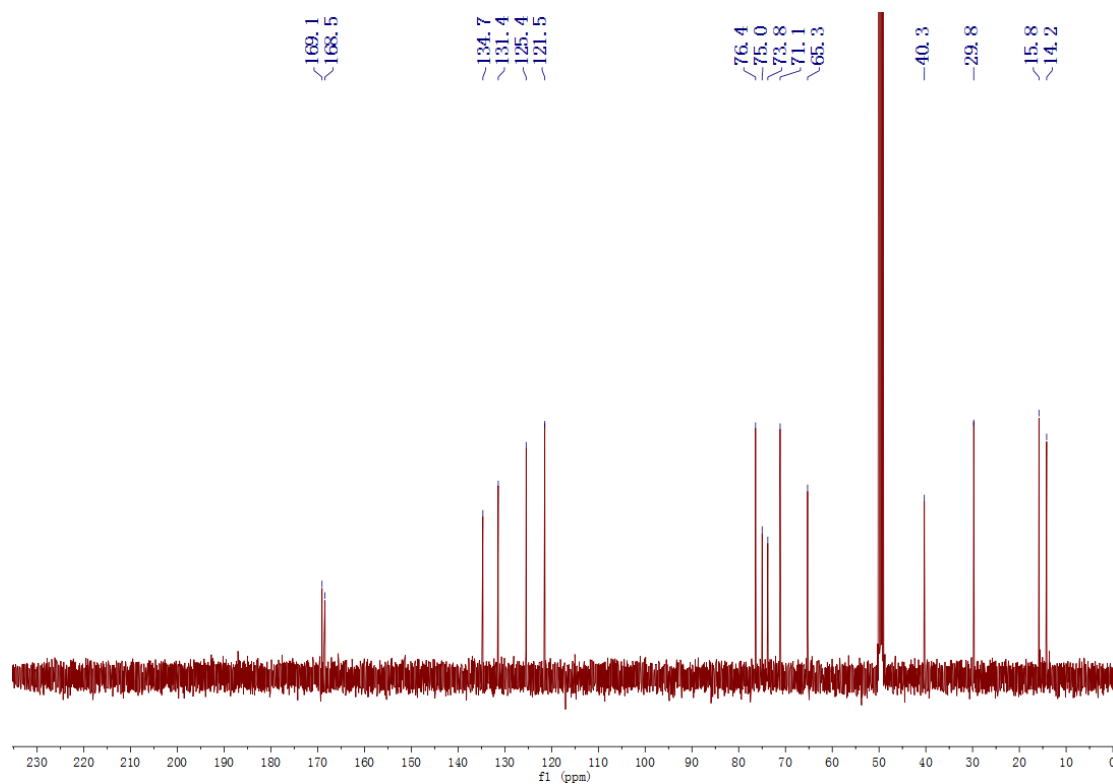

Figure S40. <sup>13</sup>C NMR spectrum of compound 9 in CD<sub>3</sub>OD.

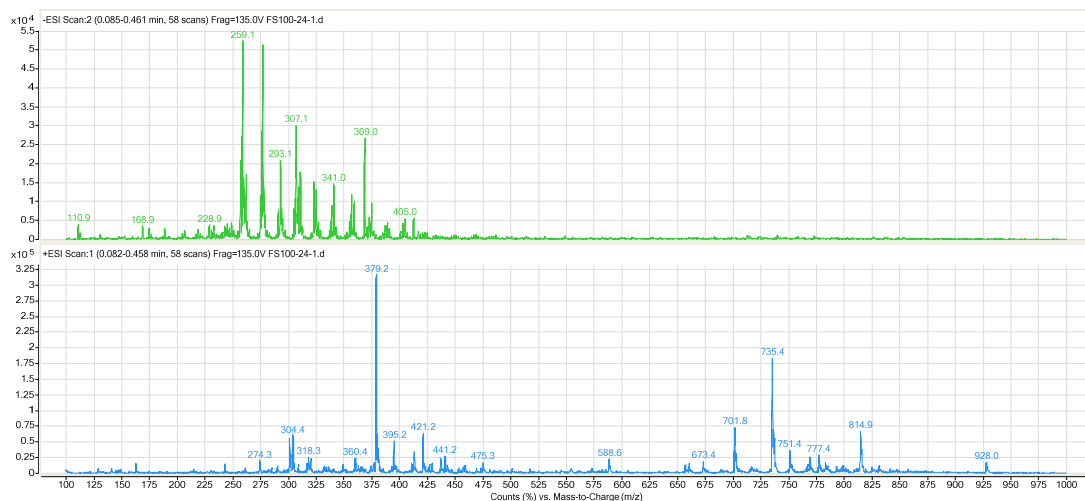

Figure S41. ESI-MS spectrum of compound 9.

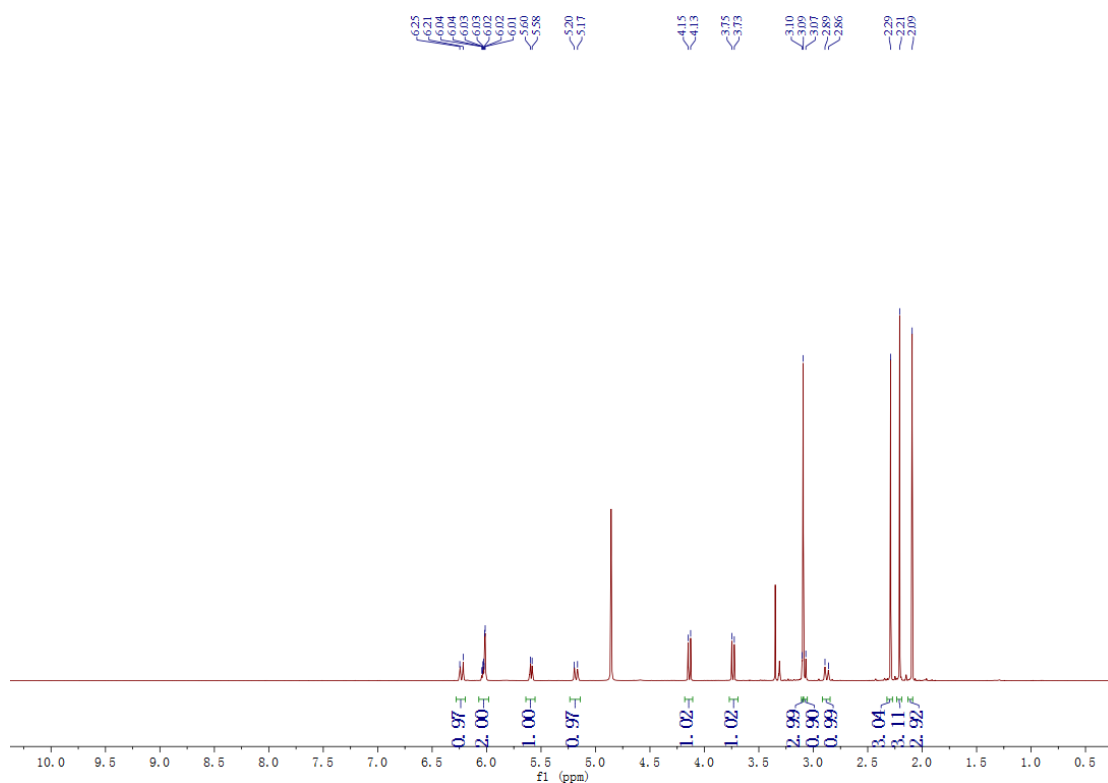

Figure S42. <sup>1</sup>H NMR spectrum of compound 10 in CD<sub>3</sub>OD.

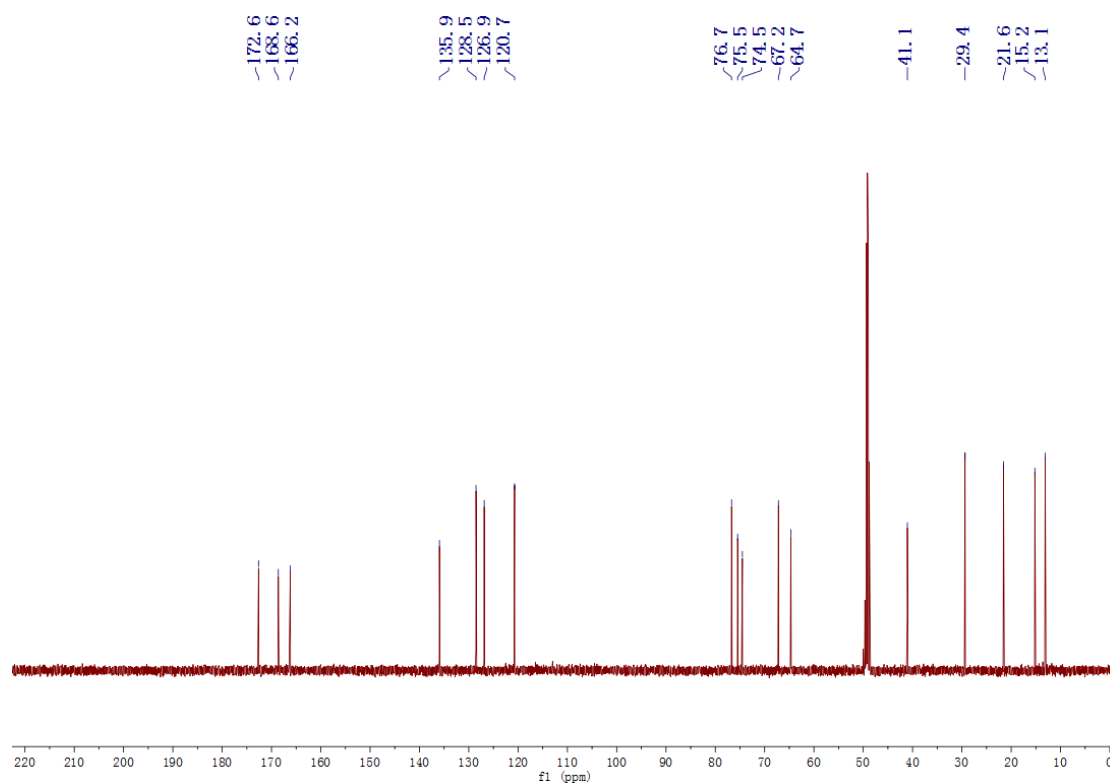

Figure S43. <sup>13</sup>C NMR spectrum of compound 10 in CD<sub>3</sub>OD.

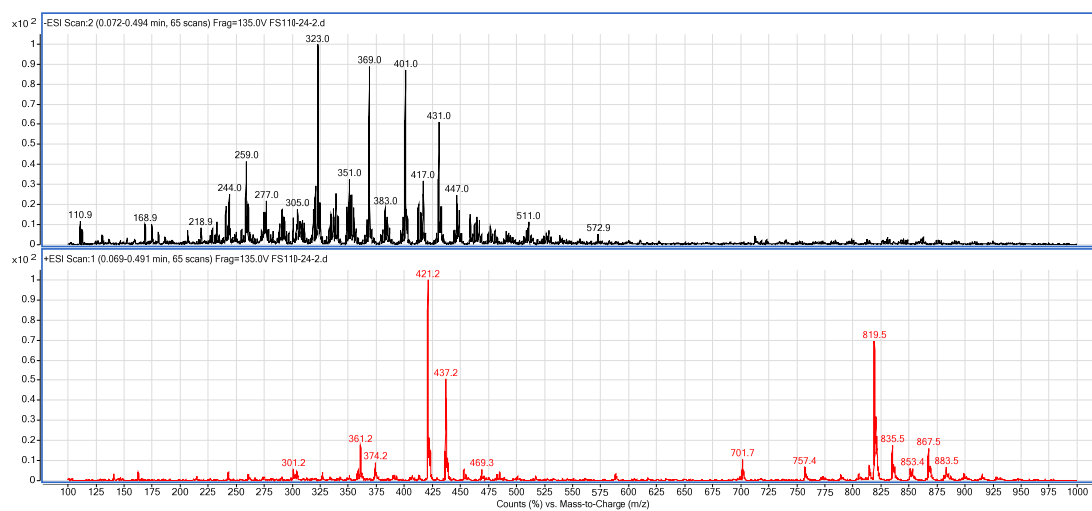

Figure S44. ESI-MS spectrum of compound 10.

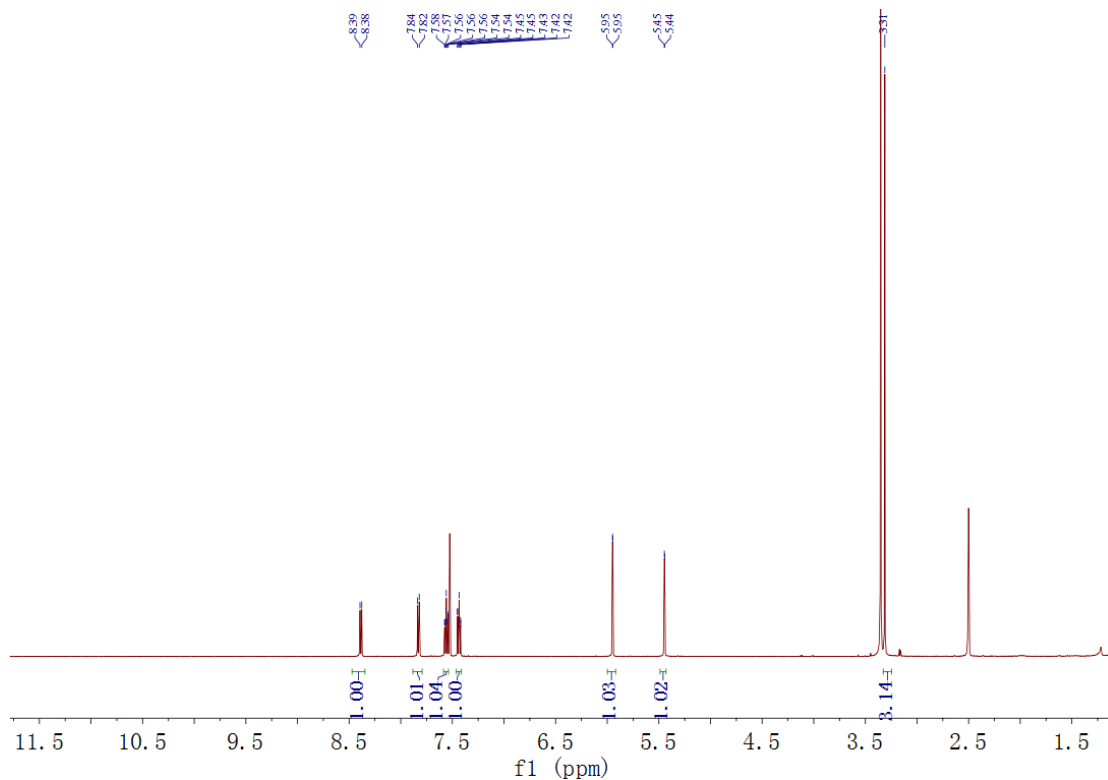

Figure S45. <sup>1</sup>H NMR spectrum of compound 11 in DMSO-*d*<sub>6</sub>.

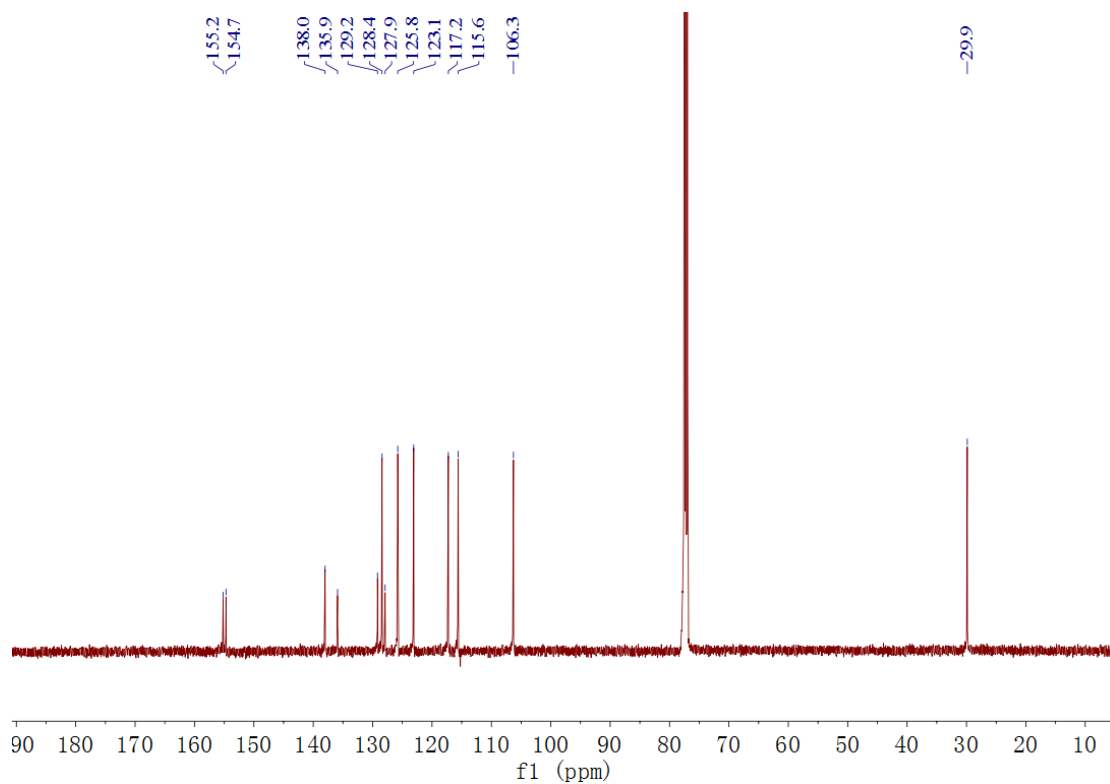

Figure S46. <sup>13</sup>C NMR spectrum of compound 11 in CDCl<sub>3</sub>.



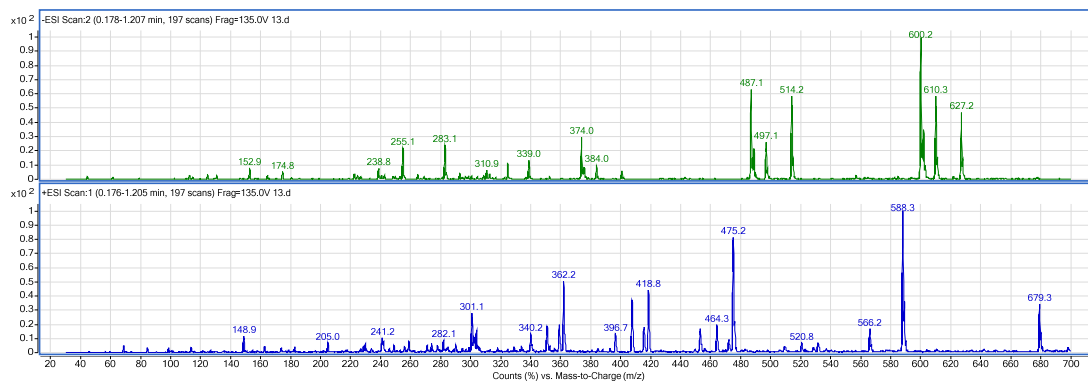

Figure S47. ESI-MS spectrum of compound 11.
